# Supplementary material
Source: PubMed Central journal article supplement (PMC3306713)
Supplement: 1115488109_sfig05.pdf [file 1115488109_sfig05.pdf]

|            |   |                |                  |                                                      |                |                |    |   |    |   |     |
|------------|---|----------------|------------------|------------------------------------------------------|----------------|----------------|----|---|----|---|-----|
|            |   | *              | 20               | *                                                    | 40             | *              | 60 | * | 80 | * | 100 |
| a4Human    | : | HVETRAHAEERLLK | LFSGYNKWSRPVANI  | SDVVLVRFGLSIAQLIDVDEKNQMMTTNVVVKQEWHDYKLRWDPADYENVT  | SIRIPSELIWRPDI | VLYNNADGDFAVTH |    |   |    |   |     |
| a4Chimp    | : | HVETRAHAEERLLK | LFSGYNKWSRPVANI  | SDVVLVRFGLSIAQLIDVDEKNQMMTTNVVVKQEWHDYKLRWDPADYENVT  | SIRIPSELIWRPDI | VLYNNADGDFAVTH |    |   |    |   |     |
| a4Marmoset | : | HVETRAHAEERLLK | LFSGYNKWSRPVANI  | SDVVLVRFGLSIAQLIDVDEKNQMMTTNVVVKQEWHDYKLRWDPADYENVT  | SIRIPSELIWRPDI | VLYNNADGDFAVTH |    |   |    |   |     |
| a4Rat      | : | HIETRAHAEERLLK | LFSGYNKWSRPVANI  | SDVVLVRFGLSIAQLIDVDEKNQMMTTNVVVKQEWHDYKLRWDPADYENVT  | SIRIPSELIWRPDI | VLYNNADGDFAVTH |    |   |    |   |     |
| a4Mouse    | : | HIETRAHAEERLLK | LFSGYNKWSRPVANI  | SDVVLVRFGLSIAQLIDVDEKNQMMTTNVVVKQEWHDYKLRWDPADYENVT  | SIRIPSELIWRPDI | VLYNNADGDFAVTH |    |   |    |   |     |
| a4Cow      | : | HAETRAHAEERLLK | LFSGYNKWSRPVANI  | SDAVLVRFGLSIAQLIDVDEKNQMMTTNVVVKQEWHDYKLRWDPADYENVT  | SIRIPSELIWRPDI | VLYNNADGDFAVTH |    |   |    |   |     |
| a4Dolphin  | : | HVETRAHAEERLLK | LFSGYNKWSRPVANI  | SDVVLVRFGLSIAQLIDVDEKNQMMTTNVVVKQEWHDYKLRWDPADYENVT  | SIRIPSELIWRPDI | VLYNNADGDFAVTH |    |   |    |   |     |
| a4Microbat | : | HVETRAHAEERLLK | LFSGYNKWSRPVANI  | SDVVLVRFGLSIAQLIDVDEKNQMMTTNVVVKQEWHDYKLRWDPADYENVT  | SIRIPSELIWRPDI | VLYNNADGDFAVTH |    |   |    |   |     |
| a4Megabat  | : | HVETRAHAEERLLK | LFSGYNKWSRPVANI  | SDVVLVRFGLSIAQLIDVDEKNQMMTTNVVVKQEWHDYKLRWDPADYENVT  | SIRIPSELIWRPDI | VLYNNADGDFAVTH |    |   |    |   |     |
| a4Cat      | : | HVETRAHAEERLLK | LFSGYNKWSRPVANI  | SDVVLVRFGLSIAQLIDVDEKNQMMTTNVVVKQEWHDYKLRWDPADYENVT  | SIRIPSELIWRPDI | VLYNNADGDFAVTH |    |   |    |   |     |
| a4Dog      | : | HVETRAHAEERLLK | LFSGYNKWSRPVANI  | SDVVLVRFGLSIAQLIDVDEKNQMMTTNVVVKQEWHDYKLRWDPADYENVT  | SIRIPSELIWRPDI | VLYNNADGDFAVTH |    |   |    |   |     |
| a4Elephant | : | HVETRAHAEERLLK | LFSGYNKWSRPVANI  | SDVVLVRFGLSIAQLIDVDEKNQMMTTNVVVKQEWHDYKLRWDPADYENVT  | SIRIPSELIWRPDI | VLYNNADGDFAVTH |    |   |    |   |     |
| a4Kangaroo | : | HVETRAHAEERLLK | LFSGYNKWSRPVANI  | SDVVI VRFGLSIAQLIDVDEKNQMMTTNVVVKQEWHDYKLRWDPADYENVT | SIRIPSELIWRPDI | VLYNNADGDFAVTH |    |   |    |   |     |
| a4Opossum  | : | HVETRAHAEERLLK | LFSGYNKWSRPVANI  | SDVVLVRFGLSIAQLIDVDEKNQMMTTNVVVKQEWHDYKLRWDPADYENVT  | SIRIPSELIWRPDI | VLYNNADGDFAVTH |    |   |    |   |     |
| a4Platypus | : | HIETRAHAEERLLK | LFSGYNKWSRPVANI  | SDVVLVRFGLSIAQLIDVDEKNQMMTTNVVVKQEWHDYKLRWDPADYENVT  | SIRIPSELIWRPDI | VLYNNADGDFAVTH |    |   |    |   |     |
| a4Lizard   | : | HVETRAHAEERLLK | LFSGYNKWSRPVANI  | SDVVI VRFGLSIAQLIDVDEKNQMMTTNVVVKQEWHDYKLRWDPADYENVT | SIRIPSELIWRPDI | VLYNNADGDFAVTH |    |   |    |   |     |
| a4Chick    | : | HVETRAHAEERLLK | LFSGYNKWSRPVANI  | SDVVLVRFGLSIAQLIDVDEKNQMMTTNVVVKQEWHDYKLRWDPADYENVT  | SIRIPSELIWRPDI | VLYNNADGDFAVTH |    |   |    |   |     |
| a4Finch    | : | HVETRAHAEERLLK | LFSGYNKWSRPVANI  | SDVVLVRFGLSIAQLIDVDEKNQMMTTNVVVKQEWHDYKLRWDPADYENVT  | SIRIPSELIWRPDI | VLYNNADGDFAVTH |    |   |    |   |     |
| a4Frog     | : | HIETRAHAEERLLK | LFSGYNKWSRPVANI  | SDAVMVRFGLSIAQLIDVDEKNQMMTTNVVVKQEWHDYKLRWDPADYENVT  | SIRIPSELIWRPDI | VLYNNADGDFAVTH |    |   |    |   |     |
| a4Zebrafis | : | MSPAHAHAEERLLQ | SLFINYNKLSRPVANI | SDVVLVRFGLSIAQLIDVDEKNQMMTTNVVVKQEWHDYKLRWDPADYENVT  | SIRIPSELIWRPDI | VLYNNADGDFAVTH |    |   |    |   |     |
| a4Medaka   | : | QIETRAHAEERLLQ | NLFARYNKLSRPVANI | SDTVLVRFGLSIAQLIDVDEKNQMMTTNVVVKQEWHDYKLRWDPADYENVT  | SIRIPSELIWRPDI | VLYNNADGDFAVTH |    |   |    |   |     |
| a4Fugu     | : | QVAPRAHAEERLLQ | DLFAHYNKLSRPVANI | SDTVLVRFGLSIAQLIDVDEKNQMMTTNVVVKQEWHDYKLRWDPADYENVT  | SIRIPSELIWRPDI | VLYNNADGDFAVTH |    |   |    |   |     |

|            |   |                 |                 |         |                  |            |                   |             |                    |           |     |   |   |
|------------|---|-----------------|-----------------|---------|------------------|------------|-------------------|-------------|--------------------|-----------|-----|---|---|
|            |   | *               | 120             | *       | 140              | *          | 160               | *           | 180                | *         | 200 | * | 2 |
| a4Human    | : | LTKAHLFHDGRVQWT | PPAIYKSSCSIDVTF | FPFDQNC | TMKFGSWTYDKAKIDL | VNMHSRVDQ  | LDWFESGEWVIVDAVGT | YNTIRKYECCA | EIYDPDITYAFV       | IIRRLPLFY |     |   |   |
| a4Chimp    | : | LTKAHLFHDGRVQWT | PPAIYKSSCSIDVTF | FPFDQNC | TMKFGSWTYDKAKIDL | VNMHSRVDQ  | LDWFESGEWVIVDAVGT | YNTIRKYECCA | EIYDPDITYAFV       | IIRRLPLFY |     |   |   |
| a4Marmoset | : | LTKAHLFHDGRVQWT | PPAIYKSSCSIDVTF | FPFDQNC | TMKFGSWTYDKAKIDL | VSMHSRVDQ  | LDWFESGEWVIVDAVGT | YNTIRKYECCA | EIYDPDITYAFV       | IIRRLPLFY |     |   |   |
| a4Rat      | : | LTKAHLFYDGRVQWT | PPAIYKSSCSIDVTF | FPFDQNC | TMKFGSWTYDKAKIDL | VSIHSRVDQ  | LDWFESGEWVIVDAVGT | YNTIRKYECCA | EIYDPDITYAFI       | IIRRLPLFY |     |   |   |
| a4Mouse    | : | LTKAHLFYDGRVQWT | PPAIYKSSCSIDVTF | FPFDQNC | TMKFGSWTYDKAKIDL | VSMHSRVDQ  | LDWFESGEWVIVDAVGT | YNTIRKYECCA | EIYDPDITYAFI       | IIRRLPLFY |     |   |   |
| a4Cow      | : | LTKAHLFHDGRVQWT | PPAIYKSSCSIDVTF | FPFDQNC | TMKFGSWTYDKAKIDL | VSMHSRVDQ  | LDWFESGEWVIVDAVGT | YNTIRKYECCA | EIVSDITYAFI        | IIRRLPLFY |     |   |   |
| a4Dolphin  | : | LTKAHLFHDGRVQWT | PPAIYKSSCSIDVTF | FPFDQNC | TMKFGSWTYDKAKIDL | VSMHSHVDQ  | LDWFESGEWVIVDAVGT | YNTIRKYECCA | EIVSDITYAFV        | IIRRLPLFY |     |   |   |
| a4Microbat | : | LTKAHLFHDGRVQWT | PPAIYKSSCSIDVTF | FPFDQNC | TMKFGSWTYDKAKVDL | VSMHSHVDRL | LDWFESGEWVIVDAVGT | YNTIRKYECCA | EIVSDITYAFI        | IIRRLPLFY |     |   |   |
| a4Megabat  | : | LTKAHLFHDGRVQWT | PPAIYKSSCSIDVTF | FPFDQNC | TMKFGSWTYDKAKIDL | VSMHSRVDQ  | LDWFESGEWVIVDAVGT | YNTIRKYACCA | EIVY????????????FY |           |     |   |   |
| a4Cat      | : | LTKAHLFHDGRVQWT | PPAIYKSSCSIDVTF | FPFDQNC | TMKFGSWTYDKAKIDL | VNMHSRVDQ  | LDWFESGEWVIVDAVGT | YNTIRKYECCA | EIVSDITYAFV        | IIRRLPLFY |     |   |   |
| a4Dog      | : | LTKAHLFYDGRVQWT | PPAIYKSSCSIDVTF | FPFDQNC | TMKFGSWTYDKAKIDL | VSMHSRVDQ  | LDLWESGEWVIVDAVGT | YNTIRKYECCA | EIVSDITYAFV        | IIRRLPLFY |     |   |   |
| a4Elephant | : | LTKAHLFHDGRVQWT | PPAIYKSSCSIDVTF | FPFDQNC | TMKFGSWTYDKAKIDL | VSMHRRVDQ  | LDYWESGEWVIVDAVGN | YNTIKKYECCA | EIVSDITYAFI        | IIRRLPLFY |     |   |   |
| a4Kangaroo | : | LTKAHLFYDGRVQWT | PPAIYKSSCSIDVTF | FPFDQNC | TMKFGSWTYDKAKIDL | VSMHSHVDQ  | LDYWESGEWVIVDAVGN | YNTIKKYECCA | EIVSDITYSFI        | IIRRLPLFY |     |   |   |
| a4Opossum  | : | LTKAHLFYDGRVQWT | PPAIYKSSCSIDVTF | FPFDQNC | TMKFGSWTYDKAKIDL | VSMHSHVDQ  | LDYWESGEWVIVDAVGN | YNTIKKYECCA | EIVSDITYSFI        | IIRRLPLFY |     |   |   |
| a4Platypus | : | LTKAHLFYDGRVQWT | PPAIYKSSCSIDVTF | FPFDQNC | TMKFGSWTYDKAKIDL | VSMHSHVDQ  | LDYWESGEWVIVDAVGN | YNTIKKYECCA | EIVSDITYSFI        | IIRRLPLFY |     |   |   |
| a4Lizard   | : | LTKAHLFYDGRVQWT | PPAIYKSSCSIDVTF | FPFDQNC | TMKFGSWTYDKAKIDL | ESMHRHVDQ  | LDYWESGEWVIVDAVGN | YNTIKKYECCA | EIVSDITYSFI        | IIRRLPLFY |     |   |   |
| a4Chick    | : | LTKAHLFYDGRVQWT | PPAIYKSSCSIDVTF | FPFDQNC | TMKFGSWTYDKAKIDL | VSMHSHVDQ  | LDYWESGEWVIVDAVGN | YNTIKKYECCA | EIVSDITYSFI        | IIRRLPLFY |     |   |   |
| a4Finch    | : | LTKAHLFYDGRVQWT | PPAIYKSSCSIDVTF | FPFDQNC | TMKFGSWTYDKAKIDL | VSMHSHVDQ  | LDYWESGEWVIVDAVGN | YNTIKKYECCA | EIVSDITYSFI        | IIRRLPLFY |     |   |   |
| a4Frog     | : | LTKAHLFHDGRVQWT | PPAIYKSSCSIDVTF | FPFDQNC | TMKFGSWTYDKAKIDL | ISMHSHVDQ  | LDYWESGEWVIVDAVGN | YNTIKKYECCA | EIVSDITYSFI        | IIRRLPLFY |     |   |   |
| a4Zebrafis | : | LTKAQLFYNGRIKWM | PPAIYKSSCSIDVTF | FPFDQNC | TMKFGSWTYDKAKIDL | ISMASHVDQ  | LDYWESGEWVIVDAVGN | YNTIKKYECCA | EIVSDITYSFI        | IIRRLPLFY |     |   |   |
| a4Medaka   | : | LTKAHLFYDGRVQWT | PPAIYKSSCSIDVTF | FPFDQNC | TMKFGSWTYDKAKIDL | ISMASHVDQ  | LDYWESGEWVIVDAVGN | YNTIKKYECCA | EIVSDITYSFI        | IIRRLPLFY |     |   |   |
| a4Fugu     | : | LTKAQLFYDGRVQWT | PPAIYKSSCSIDVTF | FPFDQNC | TMKFGSWTYDKAKIDL | ISMASHVDQ  | LDYWESGEWVIVDAVGN | YNTIKKYECCA | EIVSDITYSFI        | IIRRLPLFY |     |   |   |

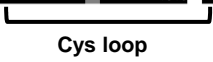

|            |    |       |                     |                           |                          |                       |                |   |     |   |     |
|------------|----|-------|---------------------|---------------------------|--------------------------|-----------------------|----------------|---|-----|---|-----|
|            | 20 | *     | 240                 | *                         | 260                      | *                     | 280            | * | 300 | * | 320 |
| a4Human    | :  | TINLI | IPCLLISCLTVLVFYLPSE | CGEKITLCISVLLSLTVFLLLITEI | IPSTSLVIPLIGEYLLFTMIFVTL | IVITVFLNVVHHRSPRTHMPT | IVVRRVFLDIVPRL |   |     |   |     |
| a4Chimp    | :  | TINLI | IPCLLISCLTVLVFYLPSE | CGEKITLCISVLLSLTVFLLLITEI | IPSTSLVIPLIGEYLLFTMIFVTL | IVITVFLNVVHHRSPRTHMPT | IVVRRVFLDIVPRL |   |     |   |     |
| a4Marmoset | :  | TVNLI | IPCLLISCLTVLVFYLPSE | CGEKVTLCSVLLSLTVFLLLITEI  | IPSTSLVIPLIGEYLLFTMIFVTL | IVITVFLNVVHHRSPRTHMPT | IVVRRVFLDIVPRL |   |     |   |     |
| a4Rat      | :  | TINLI | IPCLLISCLTVLVFYLPSE | CGEKVTLCSVLLSLTVFLLLITEI  | IPSTSLVIPLIGEYLLFTMIFVTL | IVITVFLNVVHHRSPRTHMPT | IVVRRVFLDIVPRL |   |     |   |     |
| a4Mouse    | :  | TINLI | IPCLLISCLTVLVFYLPSE | CGEKVTLCSVLLSLTVFLLLITEI  | IPSTSLVIPLIGEYLLFTMIFVTL | IVITVFLNVVHHRSPRTHMPT | IVVRRVFLDIVPRL |   |     |   |     |
| a4Cow      | :  | TINLI | IPCLLISCLTVLVFYLPSE | CGEKITLCISVLLSLTVFLLLITEI | IPSTSLVIPLIGEYLLFTMIFVTL | IVITVFLNVVHHRSPRTHMPT | IVVRRVFLDIVPRL |   |     |   |     |
| a4Dolphin  | :  | TVNLI | IPCLLISCLTVLVFYLPSE | CGEKVTLCSVLLSLTVFLLLITEI  | IPSTSLVIPLIGEYLLFTMIFVTL | IVITVFLNVVHHRSPRTHMPT | IVVRRVFLDIVPRL |   |     |   |     |
| a4Microbat | :  | TVNLI | IPCLLISCLTVLVFYLPSE | CGEKVTLCSVLLSLTVFLLLITEI  | IPSTSLVIPLIGEYLLFTMIFVTL | IVITVFLNVVHHRSPRTHMPT | IVVRRVFLDIVPRL |   |     |   |     |
| a4Megabat  | :  | TVNLI | IPCLLISCLTVLVFYLPSE | CGEKVTLCSVLLSLTVFLLLITEI  | IPSTSLVIPLIGEYLLFTMIFVTL | IVITVFLNVVHHRSPRTHMPT | IVVRRVFLDIVPRL |   |     |   |     |
| a4Cat      | :  | TINLI | IPCLLISCLTVLVFYLPSE | CGEKITLCISVLLSLTVFLLLITEI | IPSTSLVIPLIGEYLLFTMIFVTL | IVITVFLNVVHHRSPRTHMPT | IVVRRVFLDIVPRL |   |     |   |     |
| a4Dog      | :  | TINLI | IPCLLISCLTVLVFYLPSE | CGEKITLCISVLLSLTVFLLLITEI | IPSTSLVIPLIGEYLLFTMIFVTL | IVITVFLNVVHHRSPRTHMPT | IVVRRVFLDIVPRL |   |     |   |     |
| a4Elephant | :  | TINLI | IPCLLISCLTVLVFYLPSE | CGEKVTLCSVLLSLTVFLLLITEI  | IPSTSLVIPLIGEYLLFTMIFVTL | IVITVFLNVVHHRSPRTHMPT | IVVRRVFLDIVPRL |   |     |   |     |
| a4Kangaroo | :  | TINLI | IPCLLISCLTVLVFYLPSE | CGEKITLCISVLLSLTVFLLLITEI | IPSTSLVIPLIGEYLLFTMIFVTL | IVITVFLNVVHHRSPRTHMPT | IVVRRVFLDIVPRL |   |     |   |     |
| a4Opossum  | :  | TINLI | IPCLLISCLTVLVFYLPSE | CGEKITLCISVLLSLTVFLLLITEI | IPSTSLVIPLIGEYLLFTMIFVTL | IVITVFLNVVHHRSPRTHMPT | IVVRRVFLDIVPRL |   |     |   |     |
| a4Platypus | :  | TINLI | IPCLLISCLTVLVFYLPSE | CGEKITLCISVLLSLTVFLLLITEI | IPSTSLVIPLIGEYLLFTMIFVTL | IVITVFLNVVHHRSPRTHMPT | IVVRRVFLDIVPRL |   |     |   |     |
| a4Lizard   | :  | TINLI | IPCLLISCLTVLVFYLPSE | CGEKITLCISVLLSLTVFLLLITEI | IPSTSLVIPLIGEYLLFTMIFVTL | IVITVFLNVVHHRSPRTHMPT | IVVRRVFLDIVPRL |   |     |   |     |
| a4Chick    | :  | TINLI | IPCLLISCLTVLVFYLPSE | CGEKITLCISVLLSLTVFLLLITEI | IPSTSLVIPLIGEYLLFTMIFVTL | IVITVFLNVVHHRSPRTHMPT | IVVRRVFLDIVPRL |   |     |   |     |
| a4Finch    | :  | TINLI | IPCLLISCLTVLVFYLPSE | CGEKITLCISVLLSLTVFLLLITEI | IPSTSLVIPLIGEYLLFTMIFVTL | IVITVFLNVVHHRSPRTHMPT | IVVRRVFLDIVPRL |   |     |   |     |
| a4Frog     | :  | TINLI | IPCLLISCLTVLVFYLPSE | CGEKITLCISVLLSLTVFLLLITEI | IPSTSLVIPLIGEYLLFTMIFVTL | IVITVFLNVVHHRSPRTHMPT | IVVRRVFLDIVPRL |   |     |   |     |
| a4Zebrafis | :  | TINLI | IPCLLISCLTVLVFYLPSE | CGEKITLCISVLLSLTVFLLLITEI | IPSTSLVIPLIGEYLLFTMIFVTL | IVITVFLNVVHHRSPRTHMPT | IVVRRVFLDIVPRL |   |     |   |     |
| a4Medaka   | :  | TINLI | IPCLLISCLTVLVFYLPSE | CGEKITLCISVLLSLTVFLLLITEI | IPSTSLVIPLIGEYLLFTMIFVTL | IVITVFLNVVHHRSPRTHMPT | IVVRRVFLDIVPRL |   |     |   |     |
| a4Fugu     | :  | TINLI | IPCLLISCLTVLVFYLPSE | CGEKITLCISVLLSLTVFLLLITEI | IPSTSLVIPLIGEYLLFTMIFVTL | IVITVFLNVVHHRSPRTHMPT | IVVRRVFLDIVPRL |   |     |   |     |

|            |   |                       |                         |                              |                        |                       |                              |                        |   |     |   |
|------------|---|-----------------------|-------------------------|------------------------------|------------------------|-----------------------|------------------------------|------------------------|---|-----|---|
|            | * | 340                   | *                       | 360                          | *                      | 380                   | *                            | 400                    | * | 420 | * |
| a4Human    | : | LFMKRPS-VVKDNCRRLES   | SMHK--MASAP----         | RFWPEPEGEPPATSGTQSLHPP-----  | SPSFCVPLDVP            | PAEPGP-SCKS---        | PSDQLPPQPLEAEKASPHPS         |                        |   |     |   |
| a4Chimp    | : | LFMKRPS-VVKDNCRRLES   | SMHK--MASAP----         | RFWPEPEGEPPATSGTQSLHPP-----  | SPSFCVPLDVP            | PAEPGP-SCKS---        | PSDQLPAQPLEAEKASPHASP        |                        |   |     |   |
| a4Marmoset | : | LFMKRPS-VVKDNCRRLES   | SMHK--MASAP----         | RFWPEPEGEPPITSGTHSWHPP-----  | SPSFCVPLDTPADPGH-A     | CKS---                | PSDPLPALQPPEAEKASPHPLP       |                        |   |     |   |
| a4Rat      | : | LFMKRPS-VVKDNCRRLES   | SMHK--MANAP----         | RFWPEPVGEPGILSDICNQGLS-----  | PAPTFCNPDTAVETQP-T     | CRS---                | PPLEVPDLKTSEVEKASPCPSP       |                        |   |     |   |
| a4Mouse    | : | LFMKRPS-VVKDNCRRLES   | SMHK--MANAP----         | RFWPEPESEPGILGDI             | CNQGLS-----            | PAPTFCNMDTAVETQP-T    | CRS---                       | PSHKVPDLKTSEVEKASPCPSP |   |     |   |
| a4Cow      | : | LFMKRPS-VVKDNCRRLES   | SMHK--AASTP----         | HFWPEPQGE-----               | ARSPS-----             | LTGC-VDQPIKQP-ARTT--- | PSDQVPTLQPSETEKASPCLS        |                        |   |     |   |
| a4Dolphin  | : | LFMKRPS-AVKDNCRRLVGS  | VHKE--AAGAP----         | RFWPEPRGEPELRSRGPAPSPT-----  | PSCG-PDR----           | PACTS---              | PSDQASALRPSAEKAGPCPSP        |                        |   |     |   |
| a4Microbat | : | LFMKRPP-VIKGNCRRLES   | SMHR--MASAP----         | RFWPEPEEENPMSKVQSQGPS-----   | PTPSFCAPLDAPGKQP-A     | CTL---                | PSDQAPTLQPAEAEASPCLS         |                        |   |     |   |
| a4Megabat  | : | LFMKRPP-VVKGSCRRLES   | SMHK--VAGAP----         | RFWPEPE-----                 | AGRGPS-----            | PAPSLCGLDPEVKQP-A     | CPL---                       | AAGQAPAPQPSAQTAGPCASP  |   |     |   |
| a4Cat      | : | LFMKRPS-VVKDNCRRLES   | SMHK--MAGAP----         | GFWPEPEGEPTLTSAAQSQGPS       | PASPASPSSRGLDEPAKAQA-A | CKL---                | PSDQVPAPQPSAEKGSPCPSP        |                        |   |     |   |
| a4Dog      | : | LFMKRPS-VVKDNCRRLES   | SMHK--MASAP----         | GFWPEPEGEPGVPSGTQSRGPS-----  | RTPSFCGPVDELAKPPP-A    | CKS---                | PSGQAPALRPSAEAEASPRPSP       |                        |   |     |   |
| a4Elephant | : | LFMKRPS-VVKDNCRRLES   | VHKE--MANAP----         | HFWPEPEGQGPVRRDPSSES-----    | FCTSLGEPVKP-----       | ---                   | PSEQPDLHPAEARKASACPSP        |                        |   |     |   |
| a4Kangaroo | : | LFMKRPG-VVKDNCRRLVES  | SMHK--LAGGP----         | RFWPOP--EPNFVTSTSPPAQSPDRS-- | PSASFCVHLD             | DPVKQP-VCKS---        | PSGQYTVLQHPGPKGS-PCSS        |                        |   |     |   |
| a4Opossum  | : | LFMKRPG-VVKDNCRRLVES  | SMHK--LAGGP----         | RFWPOP--EPNFVTSTSPQTPERS--   | PSASFCVHLED            | DPVKQA-VCKS---        | PSGQYTVLQHPGPKGS-PCSS        |                        |   |     |   |
| a4Platypus | : | LFMKRPA-VVKNCKKLIES   | SMHK--IASAP----         | RFWPEPEGELNFATSSNSPQSQEET--  | PSPSVRIHLED            | PANPPP-ICKS---        | PSG-----PVKDD-GPSP           |                        |   |     |   |
| a4Lizard   | : | LFMKRPT-TVKDNCKKLIES  | SMHK--IANSQ----         | RFWSETEVEPKFTTS-----         | SNEQS--PTSSFCTHLD      | DQAKLPPPICKS---       | PSGQYSML-LAEPIRAS-CTSL       |                        |   |     |   |
| a4Chick    | : | LFMKRPS-TVKDNCKKLIES  | SMHK--LTNSP----         | RLWSETDMEPNFTTSSSPQSNEPS--   | PTSSFCAHLEEP           | AKP--MCKS---          | PSGQYSML-HPEPPQVT-CSSP       |                        |   |     |   |
| a4Finch    | : | LFMKRPS-TVKDNCKKLIES  | SMHK--ITNAP----         | RLWSEMDVEPNFTTSSSPQSNEPS--   | PTSSFCAHLEEP           | AKPQP-ICKS---         | PSGQYSML-HTEPIQVT-CSSP       |                        |   |     |   |
| a4Frog     | : | LFMKRPP--AKDNCKKLIES  | LHARSFNPPP----          | RLWSEAEIEPAFASSSASPTSRPS--   | PTSSCCHOLEQSPNAQV-F    | CKS---                | PSGQYSML-CEESALTS-CPSP       |                        |   |     |   |
| a4Zebrafis | : | LFMKRPPASGKRNCGLIEM   | MHCQANSQS----           | MLRNNILDISPQSPHGLPTSA---     | AQDQVQDSTSP--KPLFF     | GSS---                | PSGQYSML-CEESALTS-CPSP       |                        |   |     |   |
| a4Medaka   | : | LFMKRPPGTAKQHCCKRLIEM | MHCPTTISATGNSQSFWTGLDSE | LRQMTQVHNSLPK----            | VDSRILVCS              | SPSSSPVDDCSD          | EDHPLKADIFCQTPSGQYSPLLEHQ    |                        |   |     |   |
| a4Fugu     | : | LFMKRPPGTAKQHCCKRLIEM | MHRPATVSGFGNSQFWTGL     | ETELRQMGVHRTIPKAL---         | TDSPSIHVSSP            | SPSSPLAN              | KNKDNQSLNANTFCQISIGRYSLLSEKQ |                        |   |     |   |

```

      440          *          460          *          480          *          500          *          520          *          540
a4Human   : GPCRPP-HGTQAPGLAKARSLSVCHMSS--PGEAVEGGVIR-CRSRSIQYCVPRDDAAPEADGQA-----AGALAS-RNTHSAELPPPDQSPCKCTCKKKEPSSVSPSAT
a4Chimp   : GPCRPP-HGTQAPGLAKARSLSVCHMSS--PGEAVEGGVIR-CRSRSIQYCVPRDDATSEAGGQA-----AGALAS-RNTHSAELPPPDQSPCKCTCKKKEPSSVSPSAT
a4Marmoset : GPCRSS-HSTQASGLAKARSLSVCHMSS--PGEVAEGILR-CRSRSIQYCAPRDDAAPEADGQA-----VGALAS-HKAHSAELPPPDQASPCCKTCRKEPSTSSSAT
a4Rat     : GSCPPPSSSGAPMLIKARSLSVCHMSS--SQEAAEDGIR-CRSRSIQYCVSODGAASLADSKP-----TSSPTS-LKARPSQLPVSDQASPCCKTC-KEPSPVSPVTV
a4Mouse   : GSCHPP-NSSGAPVLIKARSLSVCHMSS--SQEAAEGSIR-CRSRSIQYCVSODGAASLADSKP-----TGSPAS-LKTRPSQLPVSDQTSPCCKTC-KEPSPVSPITV
a4Cow     : GPCRPL-TGTQAPGLTKSRSLSVCHMSS--PSKAVEDGVR-CRSRSIQYCGPREEAASPAHLA-----DSSPSSPTKAPSAELPPPDQAASCKCQCRKEPG--APNAT
a4Dolphin : GPCRPP-TGTRAPGLAKARSLSVCHMSS--PSEVAEGGVR-CRSRSIQYCAPREEAASPADRPA-----DGSPASLTTPASAELLPPDQASPCCKCKCRTEAE--APNAA
a4Microbat : SPSRPT-TSTWDPGLAKAQSLSIQHSS--PNKAPEGGIR-CRSRSIQYCVPRDEGDTAG-----ASSPPS-LQAPWTELPPADQASPCCKCKCK????????????
a4Megabat : GPPRPP-TGTQAPGLSKARSLSVCHMSS--PARAGEGGVR-CRSRSIQYCVPRDEGDTAG-----SPAS-LKAPPAELPPPDQASPCCKTCRKEPSTGSPNTV
a4Cat     : DPCHPP-SGTRAPGLAKARSLSVCHMSS--PAEAAEDGVR-CRSRSIQYCVPRDDAASQAGGPV-----AGSPAF-LKASSAELPPPDQSPCKCRCKQKEP---SPNAA
a4Dog     : DSCRPL-----LTKARSLSVCHMSS--PPEGAEDGVR-CRSRSIQYGGPQDAASEAGGPV-----AGSPAL-LKASSAELPAPEQSPCKCRCKKKEP---SPSAV
a4Elephant : GPGHLL-SSSQATGLAKTRSLSVCHMSS--PSKVEYGGVIR-CRSRSIQYGI FRDDASAQANGQV-----ASAPPS---TCSAEP TAPDQSPCKCKCKKKEPPATSPDAT
a4Kangaroo : PTPQPPNTHPSGFSKVRSLSVCHMSS--SSKMEEGGIR-CRSRSIQYCSLQEDSSQANNGQS-----ASSPAS-LRSPKDEVQPEKPSPCCKCCKKVKAA--AQIV
a4Opossum : PTPHPLNNSHPGFSKVRSLSVCHMSS--SNKVEEGSIR-CRSRSIQYCSLQEDSSQANNGQS-----TSSPAS-LRSQKDEVQPEKPSPCCKCCKKVKATVPVDPV
a4Platypus : SASCHPLSDAQSPGLPKTRSLSVCHMSS--PGKVEEGGIR-CRSRSIQYFYLQEDSSQTN--GQSQVNGQSRSSPAS-LRSHLNRDQQQIKPSPCRCKCKKNKAPASBDPG
a4Lizard  : QPPCHSR-DSQSSMSKSRSLSVCHMSS--SPGKAEETIR-CRSRSIQYCYLQEESSQTN--GQS-----SGSPAS-PRCHLNEEQPKTKPIHCKCKCKKNESASTSGHG
a4Chick   : KPSCHPLSDTQTTSISKGRSLSVCHMSS--PNKTEEGSIR-CRSRSIQYCYLQEDSSQTN--GHS-----SASPAS-QRCHLNEEQPKHQPCKCKCKRGEAAGTPTQG
a4Finch   : QPSCHPLSDTQATSVLGRSLSVCHMSS--PSKAEETIR-CRSRSIQYCYLQEDSSQTN--GHS-----SGSPAS-QRCHLNGEQPKHQPCKCKCKRGGVAGTAAQG
a4Frog    : KPETKLLSEAQPNLMPKVRSLSVCHMSS--PKEANEAVR-CRSRSIQYCFLHEDFSQAN--GQA-----SSSPVA-QKGNENEPQSSHTSPCTCKPKSQQEKVPDPSQG
a4Zebrafis : YTCAYTNSIFASSTSFDPDILLGLTLLHIIIPQDGAKSTECDFQGHSAESVFMEEKESVVLG-----AGSCQH-CLTSEGTSLQKLDLDEAGRCRTRHNMPSAQIFSPS
a4Medaka  : ALCRHISTTHSAPQLSMP-----LGPFPCLSRHPSPLARNGRSLSVCHMCGKQGPQPSAHRC---RSQSFQYCCCLHNDGA---AGFTGQTNKTPQLTETLAAEFA
a4Fugu    : LLHGKSAASSSSQLSLPPTLPLGLLHKRTNKESNTMASIGRSLSVCHMFMFDGQKEAPCRGRYRR--RSRSFQYCCCLHDEGAGLTRATWGQKHPADHLVEIIMAEST

```

```

          *          560          *          580          *          600          *          620
a4Human   : VKTRS-TKAPPHLPLSPALTRAVEGVQYIADHLKAEDTDFSVKEDWKYVAMVIDRIFLWMFIIIVCLLGTIVGLFLPPWLAGMI
a4Chimp   : VKARS-TKAPPHLPLSPALTRAVEGVQYIADHLKAEDTDFSVKEDWKYVAMVIDRIFLWMFIIIVCLLGTIVGLFLPPWLAGMI
a4Marmoset : LKARS-TKVLPHLPLSPALTRAVEGVQYIADHLKAEDTDFSV????????????????????????????????????????????????????????????
a4Rat     : LKAGG-TKAPPQHLPLSPALTRAVEGVQYIADHLKAEDTDFSVKEDWKYVAMVIDRIFLWMFIIIVCLLGTIVGLFLPPWLAGMI
a4Mouse   : LKAGG-TKAPPQHLPLSPALTRAVEGVQYIADHLKAEDTDFSVKEDWKYVAMVIDRIFLWMFIIIVCLLGTIVGLFLPPWLAGMI
a4Cow     : LKTSS-TRAPP--LPLSPALARAVEGVQYIADHLKAEDTDFSVKEDWKYVAMVIDRIFLWVFIIVCLLGTIVGLFLPPWLAGMI
a4Dolphin : LKAPG-AGTPP--QPLSPALARAVEGVQYIADHLKAEDMDFS????????????????????????????????????????????????????????????
a4Microbat : ?????-????????????????????????????????????????????????????????????????????????????????????????????
a4Megabat : LKAHG-TKAAPRHLPLSPALTRAVEGVQYIADHLKAEDTDFSVKEDWKYVAMVIDRIFLWVFIIVCLLGTIVGLFLPPWLAGMI
a4Cat     : LKARG-TKAAPRHLPLSPALTRAVEGVQYIADHLKAEDTDFSVKEDWKYVAMVIDRIFLWVFLVCLLGTIVGLFLPPWLAGMI
a4Dog     : PKARG-TKAPPHLPLSPALTRAVEGVQYIADHLKAEDTDFSVKEDWKYVAMVIDRIFLWVFIIVCLLGTIVGLFLPPWLAGMI
a4Elephant : AHS---TKVPCRHLPLTPALARAVEGVQYIADHLKAEDMDFSV KEDWKYVAMVIDRIFLWVFLVCLLGTIVGLFLPPWLAGMI
a4Kangaroo : TKPRS--TKEQHALLMSPALKLAVEGVQYIADHLKAEDTDFSVKEDWKYVAMVIDRIFLWMFIIIVCLLGTIVGLFLPPWLAGMI
a4Opossum : TKPRS--TKEQHALLMSPALKLAVEGVQYIADHLKAEDTDFSVKEDWKYVAMVIDRIFLWMFIIIVCLLGTIVGLFLPPWLAGMI
a4Platypus : AKSQRSTKEQHALLMSPALKLAVEGVQYIADHLRAEDA DFSV KEDWKYVAMVIDRIFLWMFIIIVCLLGTIVGLFLPPWLAGMI
a4Lizard  : SKTLG--SKDQVLLMSPALKLAVEGVHYIADHLRAEDA DFSV KEDWKYVAMVIDRIFLWMFIIIVCLLGTIVGLFLPPWLAGMI
a4Chick   : SKSHS--NKGEHLVLMSPALKLAVEGVHYIADHLRAEDA DFSV KEDWKYVAMVIDRIFLWMFIIIVCLLGTIVGLFLPPWLAGMI
a4Finch   : SKSHG--AKEQHLVLMSPALKLAVEGVHYIADHLRAEDA DFSV KEDWKYVAMVIDRIFLWMFIIIVCLLGTIVGLFLPPWLAGMI
a4Frog    : AKTVN--AKEHHVLLMSPSLKLAIEGVHYIADHLRAEDA DFSV KEDWKYVAMVIDRIFLWMFIIIVCLLGTIVGLFLPPWLAGMI
a4Zebrafis : SDGSTDLNAAEPVSNLSQSLKLAIEGVHYIADHLRAEDA DFSV R E D W K Y V A M V I D R I F L W M F V L V C I L G T V G L F L P P W L A G M I
a4Medaka  : KDASTQLDNMAPI--VSPAMQRAIEGVQYIADHLRAEDA DFSV KEDWKYVAMVIDRIFLWMFVLCILGSVGLFLPPWLAGMI
a4Fugu    : KDTSSLQDFEVST--ISPAMQRAIEGVQYIADHLRAEDA DFSV KEDWKYVAMVIDRIFLWMFVLCILGSVGLFLPPWLAGMI

```



```

20          *          240          *          260          *          280          *          300          *          320
b2Human    : INLIIPCVLITSLAILVFYLPSPDCGEKMTLCISVLLALTVFLLLIISKIVPPTSLDVPLVGKYLMTMVLVTFISIVTSVCLNVHHRSPTHHTMAPWVKVVFLEKLPALL
b2Chimp    : INLIIPCVLITSLAILVFYLPSPDCGEKMTLCISVLLALTVFLLLIISKIVPPTSLDVPLVGKYLMTMVLVTFISIVTSVCLNVHHRSPTHHTMAPWVKVVFLEKLPALL
b2Marmoset : INLIIPCVLITSLAILVFYLPSPDCGEKMTLCISVLLALTVFLLLIISKIVPPTSLDVPLVGKYLMTMVLVTFISIVTSVCLNVHHRSPTHHTMAPWVKVVFLEKLPALL
b2Rat      : INLIIPCVLITSLAILVFYLPSPDCGEKMTLCISVLLALTVFLLLIISKIVPPTSLDVPLVGKYLMTMVLVTFISIVTSVCLNVHHRSPTHHTMAPWVKVVFLEKLPALL
b2Mouse    : INLIIPCVLITSLAILVFYLPSPDCGEKMTLCISVLLALTVFLLLIISKIVPPTSLDVPLVGKYLMTMVLVTFISIVTSVCLNVHHRSPTHHTMAPWVKVVFLEKLPALL
b2Cow      : INLIIPCVLITSLAILVFYLPSPDCGEKMTLCISVLLALTVFLLLIISKIVPPTSLDVPLVGKYLMTMVLVTFISIVTSVCLNVHHRSPTHHTMAPWVKVVFLEKLPALL
b2Dolphin  : INLIIPCVLITSLAILVFYLPSPDCGEKMTLCISVLLALTVFLLLIISKIVPPTSLDVPLVGKYLMTMVLVTFISIVTSVCLNVHHRSPTHHTMAPWVKVVFLEKLPALL
b2Microbat : INLIIPCVLITSLAILVFYLPSPDCGEKMTLCISVLLALTVFLLLIISKIVPPTSLDVPLVGKYLMTMVLVTFISIVTSVCLNVHHRSPTHHTMAPWVKVVFLEKLPALL
b2Megabat  : INLIIPCVLITSLAILVFYLPSPDCGEKMTLCISVLLALTVFLLLIISKIVPPTSLDVPLVGKYLMTMVLVTFISIVTSVCLNVHHRSPTHHTMAPWVKVVFLEKLPALL
b2Cat      : INLIIPCVLITSLAILVFYLPSPDCGEKMTLCISVLLALTVFLLLIISKIVPPTSLDVPLVGKYLMTMVLVTFISIVTSVCLNVHHRSPTHHTMAPWVKVVFLEKLPALL
b2Dog      : INLIIPCVLITSLAILVFYLPSPDCGEKMTLCISVLLALTVFLLLIISKIVPPTSLDVPLVGKYLMTMVLVTFISIVTSVCLNVHHRSPTHHTMAPWVKVVFLEKLPALL
b2Elephant : INLIIPCVLITSLAILVFYLPSPDCGEKMTLCISVLLALTVFLLLIISKIVPPTSLDVPLVGKYLMTMVLVTFISIVTSVCLNVHHRSPTHHTMAPWVKVVFLEKLPALL
b2Armadill : INLIIPCVLITSLAILVFYLPSPDCGEKMTLCISVLLALTVFLLLIISKIVPPTSLDVPLVGKYLMTMVLVTFISIVTSVCLNVHHRSPTHHTMAPWVKVVFLEKLPALL
b2Kangaroo : INLIIPCVLITSLAILVFYLPSPDCGEKMTLCISVLLALTVFLLLIISKIVPPTSLDVPLVGKYLMTMVLVTFISIVTSVCLNVHHRSPTHHTMAPWVKVVFLEKLPALL
b2Platypus : INLIIPCVLITSLAILVFYLPSPDCGEKMTLCISVLLALTVFLLLIISKIVPPTSLDVPLVGKYLMTMVLVTFISIVTSVCLNVHHRSPTHHTMAPWVKVVFLEKLPALL
b2Lizard   : INLIIPCVLITSLAILVFYLPSPDCGEKMTLCISVLLALTVFLLLIISKIVPPTSLDVPLVGKYLMTMVLVTFISIVTSVCLNVHHRSPTHHTMAPWVKVVFLEKLPALL
b2Chick    : INLIIPCVLITSLAILVFYLPSPDCGEKMTLCISVLLALTVFLLLIISKIVPPTSLDVPLVGKYLMTMVLVTFISIVTSVCLNVHHRSPTHHTMAPWVKVVFLEKLPALL
b2Finch    : INLIIPCVLITSLAILVFYLPSPDCGEKMTLCISVLLALTVFLLLIISKIVPPTSLDVPLVGKYLMTMVLVTFISIVTSVCLNVHHRSPTHHTMAPWVKVVFLEKLPALL
b2Frog     : INLIIPCVLITSLAILVFYLPSPDCGEKMTLCISVLLALTVFLLLIISKIVPPTSLDVPLVGKYLMTMVLVTFISIVTSVCLNVHHRSPTHHTMAPWVKVVFLEKLPALL
b2Zebrafis : INLIIPCVLITSLAILVFYLPSPDCGEKMTLCISVLLALTVFLLLIISKIVPPTSLDVPLVGKYLMTMVLVTFISIVTSVCLNVHHRSPTHHTMAPWVKVVFLEKLPALL
b2Medaka   : INLIIPCVLITSLAILVFYLPSPDCGEKMTLCISVLLALTVFLLLIISKIVPPTSLDVPLVGKYLMTMVLVTFISIVTSVCLNVHHRSPTHHTMAPWVKVVFLEKLPALL
b2Fugu     : INLIIPCVLITSLAILVFYLPSPDCGEKMTLCISVLLALTVFLLLIISKIVPPTSLDVPLVGKYLMTMVLVTFISIVTSVCLNVHHRSPTHHTMAPWVKVVFLEKLPALL

```

```

*          340          *          360          *          380          *          400          *          420          *
b2Human    : FMQQRPHHCARQLRLRRRQREREGAGA-----LFFREAPG-----ADSCTCFVNRSVQGLAGAFGAEPAPVAG----PGRSGE-----
b2Chimp    : FMQQRPHHCARQLRLRRRQREREGAGA-----LFFREAPG-----ADSCTCFVNRSVQGLAGAFGAEPAPVAG----PGRSGE-----
b2Marmoset : FMQQRPHHCARQLRLRRRQREREGAGA-----LFFREAPG-----ADSCTCFVNRSVQGLAGAFGAEPAPVAG----PGRSGE-----
b2Rat      : FLOQPRHRCARQLRLRRRQREREGAGA-----LFFREGPA-----ADPCTCFVNPASVQGLAGAFRAEP-TAAG----PGRSVG-----
b2Mouse    : FLOQPRHRCARQLRLRRRQREREGAGT-----LFFREGPA-----ADPCTCFVNPASMQGLAGAFQAEP-AAAG----LGRSMG-----
b2Cow      : FMQQRPHRCARQLRLRRRQREREGAGA-----LF-REALG-----ADSCTCFVNRSVQGLAGAFGSEPAAPAG----PGRARG-----
b2Dolphin  : FMQQRPHRCARQLRLRRRQRERGREGTGA-----VFYREALG-----ADSCTCFVNRSVQGLAGAFGSEPAAPAG----PGRSGG-----
b2Microbat : FMQQRPHHCARQLRQRRRQREREGAGA-----RFFREAPG-----ADSCTCFVNHASVQGVAGAFGAEPAPVP----GRARG-----
b2Megabat  : FMK????????????????????????????????????????????????????????????????????????????????????????????????????
b2Cat      : FMKRPDSSPARAPRPGQLRLTGLEAAST-----SSLCG-----SSMCSAAPQSPGGSGSRTAGLQDFRPRS----SG-----
b2Dog      : FMQQRPHRCARQLRLRRRQRERERE-AGA-----LFFREAPG-----ES-----YSGSAR---GGVGTD-----
b2Elephant : FMQQRPHHCARQLRLRRRQREREGAGA-----SFFREVPG-----ADSCTCFVNRSVQGLAGAFGAEPQVAG----PG----G-----
b2Armadill : FLOQPRHHGACARQLRLRRRLREREGAGA-----RFLREPRG-----ADSCTCFVNRSVQGVAGACGAEPAPAGG----AGRARE-----
b2Kangaroo : FMKQPRQNCARQHLLRQRRRQREREGEG-----RG-LFFRDAPG-----ANSCTCFVNPASVKEFGGVFGAESALMAG----RAGHVG-----
b2Opossum  : FMKQPRHNCARQLRQRRRQREREGGGVGG--GG-IFFRDAPG-----TNSCTCFVNPASVKEFGGVFGAESAESAHGYRGRAGPVG-----
b2Platypus : FMRRP????????????????????????????????????????????????????????????????????????????????????????????????????
b2Lizard   : FMKQPRQNCARQLRQKRQGHORNAAL-NAAAGSFFLRDAGAR-----SCTCYANPSAAKKGQRGAAATTTTTTTTTGQPPG-----
b2Chick    : FMKQPRQNCARQLRQRRRQRERERE-----AAAATLFLRAGAR-----ACACYANPGAAKAEG--LNGYRERQGGPDPAP-----
b2Finch    : FMKQPRQNCARQLRQRRRQRERERE-----AAAATLFFQAGAR-----ACTCYANPGAAKAEG--LNGYRERQGGQAGPAG-----
b2Frog     : FMKQPRQNCARQLRQRRRQRERERE-----AAGSFFLRDAGAR-----SCTCYANQASVKKYGAQLSELPEGVNGFRDRQGVKVR-----
b2Zebrafis : FMRQPRNSSERQLRQRRRANEQEGGRGGLAAGLMAGLGLSGSSSG-----SKENNEACTCYVNRASVKQFGAELGGGGGGGGSTDLNGIREGGRETRGGAN
b2Medaka   : FMRQPRNSCERQLRQRRRAQEQREGG-----MMGVGVG-----DDSDPCTCYVNRASVKQFGGDLGG--AGGGSMGLNRA-----
b2Fugu     : FMRQPRNSCERQLRQRRRAQEHKEGGCCGEPGGLMVGLGLGNAGSSGGGTTTGIFGKEDSDPCTCYVNRASVKQFGGDLGG--AGG-SMDGLNRARDGREGGSGNQSR

```



```

                *           20           *           40           *           60           *           80           *           100
a7Human      : HVSLQGEFQRKLYKELVKKNYNPLERPVANSDQPLTVYFSLSLQIMDVDEKNQVLTNNIWLQMSWTDHYLQWNVSEYPGVKTVRFDPDGIWKPDILLYNSADERFDATF
a7Chimp      : HVSLQGEFQRKLYKELVKKNYNPLERPVANSDQPLTVYFSLSLQIMDVDEKNQVLTNNIWLQMSWTDHYLQWNVSEYPGVKTVRFDPDGIWKPDILLYNSADERFDATF
a7Marmoset   : HVSLQGEFQRKLYKELVKKNYNPLERPVANSDQPLTVYFSLSLQIMDVDEKNQVLTNNIWLQMSWTDHYLQWNVSEYPGVKTVRFDPDGIWKPDILLYNSADERFDATF
a7Rat        : HVSLQGEFQRRLYKELVKKNYNPLERPVANSDQPLTVYFSLSLQIMDVDEKNQVLTNNIWLQMSWTDHYLQWNVSEYPGVKTVRFDPDGIWKPDILLYNSADERFDATF
a7Mouse      : HVSLQGEFQRRLYKELVKKNYNPLERPVANSDQPLTVYFSLSLQIMDVDEKNQVLTNNIWLQMSWTDHYLQWNVSEYPGVKTVRFDPDGIWKPDILLYNSADERFDATF
a7Cow        : HVSLQGEFQRKLYKDLVKKNYNPLERPVANDSLPLTVYFSLSLQIMDVDEKNQVLTNNIWLQMTWTDHYLQWNASEYPGVKTVRFDPDGIWKPDILLYNSADERFDATF
a7Dolphin    : ???SQGEFQRKLYKDLVKKNYNPLERPVANSDQPLTVYFSLSLQIMDVDEKNQVLTNNIWLQMSWMDHYLQWNVSEYPGVKTVRFDPDGIWKPDILLYN??????????
a7Megabat    : ?????????????????????????????????????????????????????????????DEKNQMMTNNVWL??SWTDHYLQWNVSEYPGVKTVRFDPDGIWKPDILLYNSADERFDATF
a7Cat        : HVSLQGEFQRKLYKELVKKNYNPLERPVANSDQPLTVYFSLSLQIMDVDEKNQVLTNNIWLQMSWTDHYLQWNVSEYPGVKTVRFDPDGIWKPDILLYNSADERFDATF
a7Dog        : HVSLQGEFQRKLYKELVKKNYNPLERPVANSDQPLTVYFSLSLQIMDVDEKNQVLTNNIWLQMSWTDHYLQWNVSEYPGVKTVRFDPDGIWKPDILLYNSADERFDATF
a7Elephant   : ?VSLQGEFQRKLYKDLVKKNYNPLERPVANSDQPLTVYFSLSLQIMDVDEKNQVLTNNIWLQMSWTDHYLQWNVSEYPGVKTVRFDPDGIWKPDILLYNSADERFDATF
a7Armadill   : ?????????????????????????????????????????????????????????????DEKNQVLTNNIWLQMSWTDHYLQWNVSEYPGVKTVRFDPDGIWKPDILLYNSADERFDATF
a7Opossum    : HASLQGEFQRKLYKELVKKNYNPLERPVANSDQPLTVYFSLSLQIMDVDEKNQVLTNNIWLQMYWTDYLYQWNVSEYPGVKTVRFDPDGIWKPDILLYNSADERFDATF
a7Platypus   : ??SQGEFQRKLYRQLVKKNYNPLERPVANSDQPLTVYFSLSLQIMDV????????????????????????????????????????????????????????SADERFDATF
a7Lizard     : ???LQGEYQRKLYKELVKKNYNPLERPVANSDQPLTVYFTLNLRLQIMDV????????????????????????????????????????????????????????RADERFDATF
a7Chick      : RESLQGEFQRKLYKELVKKNYNPLERPVANSDQPLTVYFTLSLMQIMDVDEKNQVLTNNIWLQMYWTDHYLQWNVSEYPGVKTVRFDPDGIWKPDILLYNSADERFDATF
a7Finch      : ?ESLQGEFQRKLYKELVKKNYNPLERPVANSDQPLTVYFTLSLMQIMDVDEKNQVLTNNIWLQMYWTDHYLQWNVSDYPGVKTVRFDPDGIWKPDILLYNSADERFDATF
a7Frog       : KVSQGEYQRKLYKELMKNYNPLERPVLNDSHPLTVYFGMSLMQIMDVDEKNQVLTNNIWLQMWIDYLYQWNVSEYPGVKTVRFDPDGIWKPDILLYNSADERFDASF
a7aZebrafi   : RVSQGEYHQRRLYRDLKMDYNPLERPVDNTHSLTVYFMSLSMQIMDVDEKNQVLTNNIWLQLYWYDYLOWNASEYPGVTVRFDPDSQIWKPDILLYNSADERFDATF
a7bZebrafi   : QVSVOGQPYQRTLLKLLKDYNRMERPVANSDQPLTVYFSLSLQIMDVDEKNQVLTNNIWLNMHWYDYLOWNQSEYPGVKTVRFDPDGIWKPDILLYNSADKFDSTF
a7Medaka     : ?????????????????????????????????????????????????????????????DEKNQVLTNNIWLQLYWKFYLOWNMSDYPGVTVRFDPDSQIWRPDILLYNSADERFDASF
a7aFugu      : ??TVOGQPTTEERLYNYLLRRYNSMIRPVANSETLMLVRLGLSLMQIMDVDEKNQILTNNIWLQMEWTDSYLTWVSEYPGINSRLLPsrNIWKPDILLYNSADERFDATY
a7bFugu      : ??SLQCPHORTLLKLLKDYNRMERPVANSDQPLTVYFTLSLIQIMDVDEKNQILTNNIWLQMSWFDHYLOWNQSEHPGKTVRFDPDGIWKPDILLYNSADDDFDSTF
a7cFugu      : ??SVOGQQRFLTELLKDYNPMERPVANSDQALTVQFSFILIQVMDVDEKNQIITNNAWLQMWYDHYLOWNQSEYPGVKTVRFDPDQVWTIWKPDILLYNSAHDKFDATF

```

```

                *           120           *           140           *           160           *           180           *           200           *           2
a7Human      : HTNVLVNSSGHCQYLPPGIFKSSCYIDVRWFPFDVQCCKLKFGSWSYGGWSDLQMQEADISGYIPNGEWDLVGIPGKRSEKFFECCKEPYPDVTFVTMRRRTLYYGL
a7Chimp      : HTNVLVNSSGHCQYLPPGIFKSSCYIDVRWFPFDVQCCKLKFGSWSYGGWSDLQMQEADISGYIPNGEWDLVGIPGKRSEKFFECCKEPYPDVTFVTMRRRTLYYGL
a7Marmoset   : HTNVLVNSSGHCQYLPPGIFKSSCYIDVRWFPFDVQCCKLKFGSWSYGGWSDLQMQEADISGYIPNGEWDLVGIPGKRSEKFFECCKEPYPDVTFVTMRRRTLYYGL
a7Rat        : HTNVLVNASGHCQYLPPGIFKSSCYIDVRWFPFDVQCCKLKFGSWSYGGWSDLQMQEADISGYIPNGEWDLVGIPGKRSEKFFECCKEPYPDVTFVTMRRRTLYYGL
a7Mouse      : HTNVLVNASGHCQYLPPGIFKSSCYIDVRWFPFDVQCCKLKFGSWSYGGWSDLQMQEADISGYIPNGEWDLVGIPGKRSEKFFECCKEPYPDVTFVTMRRRTLYYGL
a7Cow        : HTNVLVNSSGHCQYLPPGIFKSSCYIDVRWFPFDVQCCKLKFGSWSYGGWSDLQMQEADISGYIPNGEWDLVGVLGKRSEKFFECCKEPYPDVTFVTMRRRTLYYGL
a7Dolphin    : ?????????????????????IFKSSCYIDVRWFPFDVQCCKLKFGSWSYGGWSDLQMQEADISGYIPNGEWDLVGIPGKRSEKFFECCKEPYPDVTFVTMRRRTLYYGL
a7Megabat    : HTNVLVNSSGHCQYLPP????????????????????????????????????????????????????????????????????????????????????????????????????
a7Cat        : HTNVLVNSSGHCQYLPPGIFKSSCYIDVRWFPFDVQCCKLKFGSWSYGGWSDLQMQEADISGYIPNGEWDLVGIPGKRSEKFFECCKEPYPDVTFVTMRRRTLYYGL
a7Dog        : HTNVLVNSSGHCQYLPPGIFKSSCYIDVRWFPFDVQCCKLKFGSWSYGGWSDLQMQEADISGYIPNGEWDLVGIPGKRSEKFFECCKEPYPDVTFVTMRRRTLYYGL
a7Elephant   : HTNVLVNSSGHCQYLPPGIFKSSCYIDVRWFPFDVQCCKLKFGSWSYGGWSDLQMQEADISGYIPNGEWDLVGIPGKRSEKFFECCKEPYPDVTFVTMRRRTLYYGL
a7Armadill   : HTNVLVNSSGHCQYLPPGIFKSSCYIDVRWFPFDVQCCKLKFGSWTYGGWSDLQMQEADISGYIPNGEWDLVGIPGKRSEKFFECCKEPYPDVTFVTMRRRTLYYGL
a7Opossum    : HTNVLVNSSGHCQYLPPGIFKSSCYIDVRWFPFDVQCCKLKFGSWSYGGWSDLQMQEADISGYISNGEWDLVGIPGKRSEKFFECCKEPYPDVTFVTMRRRTLYYGL
a7Platypus   : HTNVLVNSSGHCQYLPPGIFKSSCYIDVRWFPFDVQCCKLKFGSWTYGGWSDLQMQEADVSGYISNGEWDLVGVPGKRSEKFFECCKEPYPDVTFVTMRRRTLYYGL
a7Lizard     : HTNVLVNSSGHCQYLPPGIFKSTCSIDVRWFPFDVQCCKLKFGSWTYGGWSDLQMQEADISGYISNGEWDLVGVPGKRSEKFFECCKEPYPDVTFVTMRRRTLYYGL
a7Chick      : HTNVLVNSSGHCQYLPPGIFKSSCYIDVRWFPFDVQCCKLKFGSWTYGGWSDLQMQEADISGYISNGEWDLVGIPGKRSEKFFECCKEPYPDITFTVTMRRRTLYYGL
a7Finch      : HTNVLVNSSGHCQYLPPGIFKSSCYIDVRWFPFDVQCCKLKFGSWTYGGWSDLQMQEADISGYISNGEWDLVGVPGKRSEKFFECCKEPYPDVTFVTMRRRTLYYGL
a7Frog       : HTNVLVNSSGHCQYLPPGIFKSSCYIDVRWFPFDVQCCKLKFGSWTYGGWSDLQMQLESIDISEYISNGEWDLVGVPGKRSEKFFECCKEPYLDVTFVTIMRRRTLYYGL
a7aZebrafi   : HTNVLVNSSGACQYLPPGIFKSTCYIDVRWFPFDLRCCKLKFGSWTYGGWSDLQMQIDADITGYIANGEWDLVGVPGRNREKFFECCKEPYPDVTFVTMRRRTLYYGL
a7bZebrafi   : KSNVVVNSSGYCNLPPGIFMSTCNVDVRWFPFDIQCKELKFGSWTFDGLLDLQMQNEADISGYMANGEWDLVGVPGRNREKFFECCKEPYLDVTFVTMRRRTLYYAL
a7Medaka     : HTNVLVNSSGHCQYLPPGIFKSTCHIDVRWFPFDVQCCKLKFGSWTYGGWSDLQMQINADITGYIANGEWDLVGVPGRNREKFFECCKEPYPDVTFVTMRRRTLYYGL
a7aFugu      : HTNVLVNSSGHCQYLPPGIFKSTCHIDVRWFPFDVQCCKLKFGSWTFDGLLDLQMQLEADISGYIPNGEWDLVGVPGRNREKFFECCKEPYLDVTFVTMRRRTLYYGI
a7bFugu      : KTNVLVNSSGAYEYQPPGIFMSTCNVDVRWFPFDIQCKELKFGSWTFDGLLDLQMQNEADISGYMANGEWDLVGVPGRNREKFFECCKEPYLDVTFVTMRRRTLYYAL
a7cFugu      : KANVLVNSSGCEYLPPGIFTSTCNVDVRWFPFDIQCKELKFGSWTFDGLLDLQMQKQADVSGYMHNGEWDLVGVPGRNREKFFECCKEPYLDVTFVTMRRRTLYYAL

```

**Cys loop**

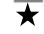

|            |    |                         |                                                                                      |   |     |   |     |   |     |   |     |
|------------|----|-------------------------|--------------------------------------------------------------------------------------|---|-----|---|-----|---|-----|---|-----|
|            | 20 | *                       | 240                                                                                  | * | 260 | * | 280 | * | 300 | * | 320 |
| a7Human    | :  | NLLIPCVLISALALLVFLLPADS | GEKISLGITVLLSLTVFMLLVAEIMPATSDSVPLIAQYFASTMIIVGLSVVVTVIVLQYHHHPDGGKMPKWTRVILLNWCWFLR |   |     |   |     |   |     |   |     |
| a7Chimp    | :  | NLLIPCVLISALALLVFLLPADS | GEKISLGITVLLSLTVFMLLVAEIMPATSDSVPLIAQYFASTMIIVGLSVVVTVIVLQYHHHPDGGKMPKWTRVILLNWCWFLR |   |     |   |     |   |     |   |     |
| a7Marmoset | :  | NLLIPCVLISALALLVFLLPADS | GEKISLGITVLLSLTVFMLLVAEIMPATSDSVPLIAQYFASTMIIVGLSVVVTVIVLQYHHHPDGGKMPKWTRVILLNWCWFLR |   |     |   |     |   |     |   |     |
| a7Rat      | :  | NLLIPCVLISALALLVFLLPADS | GEKISLGITVLLSLTVFMLLVAEIMPATSDSVPLIAQYFASTMIIVGLSVVVTVIVLQYHHHPDGGKMPKWTRVILLNWCWFLR |   |     |   |     |   |     |   |     |
| a7Mouse    | :  | NLLIPCVLISALALLVFLLPADS | GEKISLGITVLLSLTVFMLLVAEIMPATSDSVPLIAQYFASTMIIVGLSVVVTVIVLQYHHHPDGGKMPKWTRVILLNWCWFLR |   |     |   |     |   |     |   |     |
| a7Cow      | :  | NLLIPCVLISALALLVFLLPADS | GEKISLGITVLLSLTVFMLLVAEIMPATSDSVPLIAQYFASTMIIVGLSVVVTVIVLQYHHHPDGGKMPKWTRVILLNWCWFLR |   |     |   |     |   |     |   |     |
| a7Dolphin  | :  | NLLIPCVLISALALLVFLLPADS | GEKISLGITVLLSLTVFMLLVAEIMPATSDSVPLIAQYFASTMIIVGLSVVVTVIVLQYHHHPDGGKMPKWTRVILLNWCWFLR |   |     |   |     |   |     |   |     |
| a7Megabat  | :  | ????????????????????    | GEKISLGITVLLSLTVFMLLVAEIMPATSDSVPLIAQYFASTMIIVGLSVVVTVIVLQYHHHPDGGKMPKWTRVILLNWCWFLR |   |     |   |     |   |     |   |     |
| a7Cat      | :  | NLLIPCVLISALALLVFLLPADS | GEKISLGITVLLSLTVFMLLVAEIMPATSDSVPLIAQYFASTMIIVGLSVVVTVIVLQYHHHPDGGKMPKWTRVILLNWCWFLR |   |     |   |     |   |     |   |     |
| a7Dog      | :  | NLLIPCVLISALALLVFLLPADS | GEKISLGITVLLSLTVFMLLVAEIMPATSDSVPLIAQYFASTMIIVGLSVVVTVIVLQYHHHPDGGKMPKWTRVILLNWCWFLR |   |     |   |     |   |     |   |     |
| a7Elephant | :  | NLLIPCVLISALALLVFLLPADS | GEKISLGITVLLSLTVFMLLVAEIMPATSDSVPLIAQYFASTMIIVGLSVVVTVIVLQYHHHPDGGKMPKWTRVILLNWCWFLR |   |     |   |     |   |     |   |     |
| a7Armadill | :  | NLLIPCVLISALALLVFLLPADS | GEKISLGITVLLSLTVFMLLVAEIMPATSDSVPLIAQYFASTMIIVGLSVVVTVIVLQYHHHPDGGKMPKWTRVILLNWCWFLR |   |     |   |     |   |     |   |     |
| a7Opossum  | :  | NLLIPCVLISALALLVFLLPADS | GEKISLGITVLLSLTVFMLLVAEIMPATSDSVPLIAQYFASTMIIVGLSVVVTVIVLQYHHHPDGGKMPKWTRVILLNWCWFLR |   |     |   |     |   |     |   |     |
| a7Platypus | :  | NLLIPCVLISALALLVFLLPADS | GEKISLGITVLLSLTVFMLLVAEIMPATSDSVPLIAQYFASTMIIVGLSVVVTVIVLQYHHHPDGGKMPKWTRVILLNWCWFLR |   |     |   |     |   |     |   |     |
| a7Lizard   | :  | NLLIPCVLISALALLVFLLPADS | GEKISLGITVLLSLTVFMLLVAEIMPATSDSVPLIAQYFASTMIIVGLSVVVTVIVLQYHHHPDGGKMPKWTRVILLNWCWFLR |   |     |   |     |   |     |   |     |
| a7Chick    | :  | NLLIPCVLISALALLVFLLPADS | GEKISLGITVLLSLTVFMLLVAEIMPATSDSVPLIAQYFASTMIIVGLSVVVTVIVLQYHHHPDGGKMPKWTRVILLNWCWFLR |   |     |   |     |   |     |   |     |
| a7Finch    | :  | NLLIPCVLISALALLVFLLPADS | GEKISLGITVLLSLTVFMLLVAEIMPATSDSVPLIAQYFASTMIIVGLSVVVTVIVLQYHHHPDGGKMPKWTRVILLNWCWFLR |   |     |   |     |   |     |   |     |
| a7Frog     | :  | NLLIPCVLISALALLVFLLPADS | GEKISLGITVLLSLTVFMLLVAEIMPATSDSVPLIAQYFASTMIIVGLSVVVTVIVLQYHHHPDGGKMPKWTRVILLNWCWFLR |   |     |   |     |   |     |   |     |
| a7aZebrafi | :  | NLLIPCVLISALALLVFLLPADS | GEKISLGITVLLSLTVFMLLVAEIMPATSDSVPLIAQYFASTMIIVGLSVVVTVIVLQYHHHPDGGKMPKWTRVILLNWCWFLR |   |     |   |     |   |     |   |     |
| a7bZebrafi | :  | NLLIPCVLISALALLVFLLPADS | GEKISLGITVLLSLTVFMLLVAEIMPATSDSVPLIAQYFASTMIIVGLSVVVTVIVLQYHHHPDGGKMPKWTRVILLNWCWFLR |   |     |   |     |   |     |   |     |
| a7Medaka   | :  | NLLIPCVLISALALLVFLLPADS | GEKISLGITVLLSLTVFMLLVAEIMPATSDSVPLIAQYFASTMIIVGLSVVVTVIVLQYHHHPDGGKMPKWTRVILLNWCWFLR |   |     |   |     |   |     |   |     |
| a7aFugu    | :  | NLLIPCVLISALALLVFLLPADS | GEKISLGITVLLSLTVFMLLVAEIMPATSDSVPLIAQYFASTMIIVGLSVVVTVIVLQYHHHPDGGKMPKWTRVILLNWCWFLR |   |     |   |     |   |     |   |     |
| a7bFugu    | :  | NLLIPCVLISALALLVFLLPADS | GEKISLGITVLLSLTVFMLLVAEIMPATSDSVPLIAQYFASTMIIVGLSVVVTVIVLQYHHHPDGGKMPKWTRVILLNWCWFLR |   |     |   |     |   |     |   |     |
| a7cFugu    | :  | NLLIPCVLISALALLVFLLPADS | GEKISLGITVLLSLTVFMLLVAEIMPATSDSVPLIAQYFASTMIIVGLSVVVTVIVLQYHHHPDGGKMPKWTRVILLNWCWFLR |   |     |   |     |   |     |   |     |

|            |   |                            |                                                          |                                    |                                                              |     |   |     |   |     |   |
|------------|---|----------------------------|----------------------------------------------------------|------------------------------------|--------------------------------------------------------------|-----|---|-----|---|-----|---|
|            | * | 340                        | *                                                        | 360                                | *                                                            | 380 | * | 400 | * | 420 | * |
| a7Human    | : | MKRPGEDKVR-PACQH---        | KQRRCSLASVEMSAVAPP                                       | -----                              | ASNGNLLYIGFRGLDGVHCVPTPDS                                    |     |   |     |   |     |   |
| a7Chimp    | : | MKRPGEDKVR-PACQH---        | KQRRCSLASVEMSAVAPP                                       | -----                              | ASNGNLLYIGFRGLDGVHCVPTPDS                                    |     |   |     |   |     |   |
| a7Marmoset | : | MKRPGEDKVR-PACQH---        | TRRRCSLASVEMSAVAPP                                       | -----                              | ASNGNLLYIGFRGLDGVHCVPTPDS                                    |     |   |     |   |     |   |
| a7Rat      | : | MKRPGEDKVR-PACQH---        | KPRRCSLASVELSAGAGPP                                      | -----                              | TSNGNLLYIGFRGLEGMHCAPTDS                                     |     |   |     |   |     |   |
| a7Mouse    | : | MKRPGEDKVR-PACQH---        | KPRRCSLASVELSAGAGPP                                      | -----                              | TSNGNLLYIGFRGLEGMHCAPTDS                                     |     |   |     |   |     |   |
| a7Cow      | : | MKRPGEDKVR-PACQH---        | NERRCSLASVEMSAVAGPP                                      | -----                              | ATNGNLLYIGFRGLDTMHCAPTDS                                     |     |   |     |   |     |   |
| a7Dolphin  | : | MKRPGEDKVR-PACQH---        | KQRRCSLASVEMSAMAGPP                                      | -----                              | ATNGNLLYIGFRGLDSVHCAPTDS                                     |     |   |     |   |     |   |
| a7Megabat  | : | MKRPGEDRVR-PACQL---        | APRRCSLASVDMGAVATPP                                      | -----                              | AANGNLLYIGFRGLDGGPCAPTDS                                     |     |   |     |   |     |   |
| a7Cat      | : | MKRPGEDQVR-PACQH---        | KPRRCSLASVEMSAVARAT                                      | -----                              | TTNGNLLYIGFRGLDGVHCAPTDS                                     |     |   |     |   |     |   |
| a7Dog      | : | MKRPGEDKVR-PACQH---        | KQRRCSLASVEMSAVAGPP                                      | -----                              | TTNGNLLYIGFRGLDGVHCAPTDS                                     |     |   |     |   |     |   |
| a7Elephant | : | MKRPGEDKVR-PACQH---        | KQRRCSLASVEMNAMAGPP                                      | -----                              | TSNGNLLYIGFRGLDTVHCAPTDS                                     |     |   |     |   |     |   |
| a7Armadill | : | MKRPGEDRVR-PACQH---        | KQRRCSLASVELSAPPAPA                                      | -----                              | ANGNLLYIGFRGLDALHCAPTDS                                      |     |   |     |   |     |   |
| a7Opossum  | : | MKRPGEDKVR-PACQH---        | KQRRCSLASVELNMSGQP                                       | -----                              | TSNGNLLYIGFRGLEGTCHMCPASDS                                   |     |   |     |   |     |   |
| a7Platypus | : | MKRPGEEKVRG-PACQP---       | KARRCSLASVEMTALAGQPS                                     | -----                              | LAPTAAPAANGNLLYIGFRGLDGVHCSPTPDS                             |     |   |     |   |     |   |
| a7Lizard   | : | MKRPGEDKVR-PACQH---        | KQRRCSLASVEMINTVSGQQ                                     | -----                              | SSNGNLLYIGFRGLEGVHCTPTTDS                                    |     |   |     |   |     |   |
| a7Chick    | : | MKRPGEDKVR-PACQH---        | KQRRCSLASVEMINTVSGQQ                                     | -----                              | CSNGNLLYIGFRGLDGVHCTPTTDS                                    |     |   |     |   |     |   |
| a7Finch    | : | MKRPGEEKVR-PACQH---        | KQRRCSLASVEMINTVSGQQ                                     | -----                              | SSNGNLLYIGFRGLEGVHCTPTTDS                                    |     |   |     |   |     |   |
| a7Frog     | : | MKRPGEDKVR-PVCOH---        | KERRCSLASVDVNTVSGQQ                                      | -----                              | SSNGNLLYIGFRGLEGHCTPTPDS                                     |     |   |     |   |     |   |
| a7aZebrafi | : | MKRPGEDKVR-PACHN---        | KQRRCSLASVDLNLIS                                         | -----                              | NGNLLYIGFRGMD                                                |     |   |     |   |     |   |
| a7bZebrafi | : | MKRPGESDP-ERPP--           | CAPHLRRCSLSSQSGSLPNAPGSASADLHHHHISSTLHPLHPQSLQAAAAAGHT-- | HHLHNQNSANNNGNLLYIGFSSLDEASPPALLAD |                                                              |     |   |     |   |     |   |
| a7Medaka   | : | MRRPGEAKVL-LACHNM--        | GKRRCSLSSLELSINPVS                                       | -----                              | VPPQPHVT                                                     |     |   |     |   |     |   |
| a7aFugu    | : | MKRPGEEKVPL-LTGP---        | SKVQHRSLVYELNEDTPGP                                      | -----                              | QPTN                                                         |     |   |     |   |     |   |
| a7bFugu    | : | MKRPGEKDSP-ERPP--          | CAPHLRRCSLSSQSGSIPNPP                                    | -----                              | DHALHPLHPQGLAPLQPGGLHAGQPHVHAQS--SANNNGNLLYIGFSSLDEASPPALLAD |     |   |     |   |     |   |
| a7cFugu    | : | MKRPGETEPP-SLPHSQTASQSRKLS | SPGTSSSSSSSS                                             | -----                              | AAARPANTDQLGLSLS                                             |     |   |     |   |     |   |



```

      440          *          460          *          480          *          500          *          520          *          540
a7Human   : GVVCGRMACSPT-----HDEHLLHGG-----QPPEGDPDLAKILEEVRYIANRFRCCQDESEAVCSEWK
a7Chimp   : GVVCGRMACSPT-----HDEHLLHGG-----QPPEGDPDLAKILEEVRYIANRFRCCQDESEAVCSEWK
a7Marmoset : GVVCGRMACSPT-----HDEHLLHGG-----QPPEGDPDLAKILEEVRYIANRFRCCQDESEAVCSEWK
a7Rat     : GVVCGRLACSPT-----HDEHLLMHGA-----HPSDGDPLAKILEEVRYIANRFRCCQDESEAVCSEWK
a7Mouse   : GVVCGRLACSPT-----HDEHLLMHGT-----HPSDGDPLAKILEEVRYIANRFRCCQDESEAVCSEWK
a7Cow     : GVVCGRVACSPT-----HDEHLLHAG-----QPSEGDPDLAKILEEVRYIAHRFRCCQDESEAVCSEWK
a7Dolphin : GVVCGRVACSPT-----HDEHLLHCG-----QPSEGDPDLAKILEEVRYIAHRFRCCQDESEAVCSEWK
a7Megabat : GVVCGRLACSPA-----HDAHLLHGG-----QAPEGDPDLAKILEEVRYLAARFRRCQDESDARGSEWK
a7Cat     : GVVCGRMACSPT-----HDEQLLHGG-----QPPEGDPDLAKILEEVRYIANRFRCCQDESEAVCSEWK
a7Dog     : GVVCGRMACSPT-----HDEHLLHGG-----QPSEGDPDLAKILEEIRYIANRFRCCQDESDAICSEWK
a7Elephant : GVVCGRMACSPT-----HDGHLHGG-----QPAEGDPDLAKILEEVRYIANRFRCCQDESEAVCSEWK
a7Armadill : GVVCGRVACSPA-----HDEPLLRAP-----APDGDPLAKILEEVRYIASRFRCCQDESEAVCSEWK
a7Opossum : GVICGRMTCSP-----EENLLHSG-----HTSEGDPDLAKILEEVRYIANRFRCCQDEEEAVCNEWK
a7Platypus : GVICGRMTCSP-----EENLLHSG-----GRRSPDGGPDLAKILEEVRYLANRFRCCQDEEAAVCNEWK
a7Lizard  : GVICGRMTCSP-----DDNLLHSG-----HPSENDPDLAKILEEVRYIANRFRCCQDEEAAVCNEWK
a7Chick   : GVICGRMTCSP-----EENLLHSG-----HPSEGDPDLAKILEEVRYIANRFRCCQDEEEAVCNEWK
a7Finch   : GVICGRMTCSP-----DEENLLHSG-----HPSEGDPDLAKILEEVRYIANRFRCCQDEEEAVCNEWK
a7Frog    : GVICGRMTCSP-----DDENLLHNV-----HHSEGDPDLAKILEEVRYIANRFRCCQDDEEAVCNEWK
a7aZebrafi : TIHYATSPDSGV-----ICSRLVATGEEDVLLPGA-----QASSVSSSGPETELSKILDEVRYISKRFRCCQDEEDTVNEWK
a7bZebrafi : SVQRNSMGGPRPTVVVSPVVGSSPPPHLPSQFCSPPPPTPNLEA--TGCPSTVS-----GGGGCSCSGGGDPQLQAILLEEVRYVADRFRCCQDENESVTEQWK
a7Medaka  : GLHCCSATDPEP-----LCARFI--EEDFLR-----NDSALEVELQOILEEVRFVIGRFRCCQDEKAAVCSEWK
a7aFugu   : GVPGGRAGEDE-----TLLAKGPGSSAGNIER-----ELAKLLDEVHSTAKHFRKQDVMNMAVSNQWK
a7bFugu   : PIQRNNTSTGP-----PRVAGSPPPHLPSQFCSSPPPPASNMD---TGCPSTVSSGGGFGGGGGGLGGCSASAVGDPQLHALLEEVRFVADRFRCCQDEVSGAADQWK
a7cFugu   : SVSNGRVCGGDG----GEGASVERGGPSLVQRLPLSLKSEVPQLEGPTTPGPDASSGSSGAEAAPHPGGGLTQSPVRRQLQALLAEVQFLVBRVKEQDRQLRFAEQWK

```

```

      *          560          *          580
a7Human   : FAACVVDRCLCLMAFSVFTIICTIGILMSAPNFVEAVSKDFA
a7Chimp   : FAACVVDRCLCLMAFSVFTIICTIGILMSAPNFVEAVSKDFA
a7Marmoset : FAACVVDRCLCLMAFSVFTIICTIGILMSAPNFVEAVSKDFA
a7Rat     : FAACVVDRCLCLMAFSVFTIICTIGILMSAPNFVEAVSKDFA
a7Mouse   : FAACVVDRCLCLMAFSVFTIICTIGILMSAPNFVEAVSKDFA
a7Cow     : FAACVVDRCLCLMAFSVFTIILCTIGILMSAPNFVEAVSKDFA
a7Dolphin : FAACVVDRCLCLMAFSVFTIILCTIGILMSAPNFVEAVSKDFA
a7Megabat : FAACVVDRCLCLMAFSVFTIILCTIGILMSAPNFVEAVSKDFA
a7Cat     : FAACVVDRCLCLMAFSVFTIICTIGILMSAPNFVEAVSKDFA
a7Dog     : FAACVVDRCLCLMAFSVFTIICTIGILMSAPNFVEAVSKDFA
a7Elephant : FAACVVDRCLCLMAFSIFTIICTIGILMSAPNFVEAVSKDFA
a7Armadill : FAACVVDRCLCLMAFSVFTIICTIGILMSAPNFVEAVSKDFA
a7Opossum : FAACVVDRCLCLMAFSVFTIICTIGILMSAPNFVEAVSKDFA
a7Platypus : FAASVVDRCLCLMAFSVFTIICTIGILMSAPNFVEAVSKDFA
a7Lizard  : FAASVVDRCLCLMAFSVFTIICTIGILMSAPNFVEAVSKDFA
a7Chick   : FAASVVDRCLCLMAFSVFTIICTIGILMSAPNFVEAVSKDFA
a7Finch   : FAASVVDRCLCLMAFSVFTIICTIGILMSAPNFVEAVSKDFA
a7Frog    : FAASVVDRCLCLMAFSVFTIICTIGILMSAPNFVEAVSKDFA
a7aZebrafi : FAASVIDRCLCLMAFSVFTIILCTIGILMSAPNFVEAVSKDFA
a7bZebrafi : FAASVIDRCLCLMAFSVFTIILCTIGILMSAPNFVEAVSKDFA
a7Medaka  : FAASVIDRCLCLMAFSVFTIILCTIGILMSAPNFVEAVSKDFA
a7aFugu   : FAASVIDRCLCLMAFSVFTIILCTIGILMSAPNFVEAVSKDFA
a7bFugu   : FAASVIDRCLCLMAFSVFTIILCTIGILMSAPNFVEAVSKDFA
a7cFugu   : FAASVIDRCLCLMAFSVFTIILCTIGILMSAPNFVEAVSKDFA

```

```

          *          20          *          40          *          60          *          80          *          100
a10Human  : CLGAEGRLLAKLFRDLFANYTSALRPVADTDQTLNVTLEVTLSQIDMDERNQVLTLYLWIRQEWTDAYLRWDPNAYGGGLDAIRIPSSLVWRPDIIVLYNKADAQPPGSA
a10Chimp  : CLGAEGRLLAKLFRDLFANYTSALRPVADTDQTLNVTLEVTLSQIDMDERNQVLTLYLWIRQEWTDAYLRWDPNAYGGGLDAIRIPSSLVWRPDIIVLYNKADAQPPGSA
a10Marmose : CLGAEGRLLAKLFRDLFANYTSALRPVADTDQTLNVTLEVTLSQIDMDERNQVLTLYLWIRQEWTDAYLRWDPNAYGGGLDAIRIPSSLVWRPDIIVLYNKADAQPPGSA
a10Rat    : CLGAEGRLLAKLFRDLFANYTSALRPVADTDQTLNVTLEVTLSQIDMDERNQVLTLYLWIRQEWTDAYLRWDPNAYGGGLDAIRIPSSLVWRPDIIVLYNKADAQPPGSA
a10Mouse  : CLGAEGRLLAKLFRDLFANYTSALRPVADTDQTLNVTLEVTLSQIDMDERNQVLTLYLWIRQEWTDAYLRWDPNAYGGGLDAIRIPSSLVWRPDIIVLYNKADAQPPGSA
a10Cow    : CLGAEGRLLAKLFRDLFANYTSALRPVADTDQTLNVTLEVTLSQIDMDERNQVLTLYLWIRQEWTDAYLRWDPNAYGGGLDAIRIPSSLVWRPDIIVLYNKADAQPPGSA
a10Dolphin : ?????????????????????????????????????????????????????????????????????????????????????????????????????????????????????
a10Microba : CLGAEGRLLAKLFRDLFANYTSALRPVADTDQTLNVTLEVTLSQIDMDERNQVLTLYLWIRQEWTDAYLRWDPNAYGGGLDAIRIPSSLVWRPDIIVLYNKADAQPPGSA
a10Megabat : CLGAEGRLLAKLFRDLFANYTSALRPVADTDQTLNVTLEVTLSQIDMDERNQVLTLYLWIRQEWTDAYLRWDPNAYGGGLDAIRIPSSLVWRPDIIVLYNKADAQPPGSA
a10Dog    : CLGAEGRLLAKLFRDLFANYTSALRPVADTDQTLNVTLEVTLSQIDMDERNQVLTLYLWIRQEWTDAYLRWDPNAYGGGLDAIRIPSSLVWRPDIIVLYNKADAQPPGSA
a10Elephan : ???EGRLLAKLFRDLFANYTSALRPVADTDQTLNVTLEVTLSQIDMDERNQVLTLYLWIRQEWTDAYLRWDPNAYGGGLDAIRIPSSLVWRPDIIVLYNKADAQPPGSA
a10Armadil : CWGAEGRLLAKLFRDLFANYTSALRPVADTDQTLNVTLEVTLSQIDMDERNQVLTLYLWIRQEWTDAYLRWDPNAYGGGLDAIRIPSSLVWRPDIIVLYNKADAQPPGSA
a10Kangaro : SRAEGRLLAKLFRDLFANYTSALRPVADTDQTLNVTLEVTLSQIDMDERNQVLTLYLWIRQEWTDAYLRWDPNAYGGGLDAIRIPSSLVWRPDIIVLYNKADAQPPGSA
a10Opossum : SQAEGRLLAKLFRDLFANYTSALRPVADTDQTLNVTLEVTLSQIDMDERNQVLTLYLWIRQEWTDAYLRWDPNAYGGGLDAIRIPSSLVWRPDIIVLYNKADAQPPGSA
a10Platypu : ???EGRLLAKLFRDLFANYTSALRPVADTDQTLNVTLEVTLSQIDMDERNQVLTLYLWIRQEWTDAYLRWDPNAYGGGLDAIRIPSSLVWRPDIIVLYNKADAQPPGSA
a10Lizard  : VSGAQRGFAYKLLSDFLFANYSNALRPVADTDQTLNVTLEVTLSQIDMDERNQVLTLYLWIRQEWTDAYLRWDPNAYGGGLDAIRIPSSLVWRPDIIVLYNKADAQPPGSA
a10Chick   : CGAAQRGFAYKLLSDFLFANYSNALRPVADTDQTLNVTLEVTLSQIDMDERNQVLTLYLWIRQEWTDAYLRWDPNAYGGGLDAIRIPSSLVWRPDIIVLYNKADAQPPGSA
a10Frog    : VQGAQRGFAYKLLSDFLFANYSNALRPVADTDQTLNVTLEVTLSQIDMDERNQVLTLYLWIRQEWTDAYLRWDPNAYGGGLDAIRIPSSLVWRPDIIVLYNKADAQPPGSA
a10Zebrafi : CLCAQRGFAYKLLSDFLFANYSNALRPVADTDQTLNVTLEVTLSQIDMDERNQVLTLYLWIRQEWTDAYLRWDPNAYGGGLDAIRIPSSLVWRPDIIVLYNKADAQPPGSA
a10Medaka  : CSAQRGFAYKLLSDFLFANYSNALRPVADTDQTLNVTLEVTLSQIDMDERNQVLTLYLWIRQEWTDAYLRWDPNAYGGGLDAIRIPSSLVWRPDIIVLYNKADAQPPGSA
a10Fugu    : YFAAQRGFAYKLLSDFLFANYSNALRPVADTDQTLNVTLEVTLSQIDMDERNQVLTLYLWIRQEWTDAYLRWDPNAYGGGLDAIRIPSSLVWRPDIIVLYNKADAQPPGSA

```

```

          *          120          *          140          *          160          *          180          *          200          *          2
a10Human  : STNVVLRHDCAVRWDAPAITRSSCRVDVAAPFFDAQCGLTFGSWTHGCHQLDVRPRGAAASLADFVENVEWRVGLGMPARRRVLTYGCCSEPYPDVTFTLLLRRAAAY
a10Chimp  : STNVVLRHDCAVRWDAPAITRSSCRVDVAAPFFDAQCGLTFGSWTHGCHQLDVRPRGAAASLADFVENVEWRVGLGMPARRRVLTYGCCSEPYPDVTFTLLLRRAAAY
a10Marmose : STNVVLRHDCAVRWDAPAITRSSCRVDVAAPFFDAQCGLTFGSWTHGCHQLDVRPRGAAASLADFVENVEWRVGLGMPARRRVLTYGCCSEPYPDVTFTLLLRRAAAY
a10Rat    : STNVVLRHDCAVRWDAPAITRSSCRVDVAAPFFDAQCGLTFGSWTHGCHQLDVRPRGAAASLADFVENVEWRVGLGMPARRRVLTYGCCSEPYPDVTFTLLLRRAAAY
a10Mouse  : STNVVLRHDCAVRWDAPAITRSSCRVDVAAPFFDAQCGLTFGSWTHGCHQLDVRPRGAAASLADFVENVEWRVGLGMPARRRVLTYGCCSEPYPDVTFTLLLRRAAAY
a10Cow    : STNVVLRHDCAVRWDAPAITRSSCRVDVAAPFFDAQCGLTFGSWTHGCHQLDVRPRGAAASLADFVENVEWRVGLGMPARRRVLTYGCCSEPYPDVTFTLLLRRAAAY
a10Dolphin : STNVVLRHDCAVRWDAPAITRSSCRVDVAAPFFDAQCGLTFGSWTHGCHQLDVRPRGAAASLADFVENVEWRVGLGMPARRRVLTYGCCSEPYPDVTFTLLLRRAAAY
a10Microba : STNVVLRHDCAVRWDAPAITRSSCRVDVAAPFFDAQCGLTFGSWTHGCHQLDVRPRGAAASLADFVENVEWRVGLGMPARRRVLTYGCCSEPYPDVTFTLLLRRAAAY
a10Megabat : ITNVVLRHDCAVRWDAPAITRSSCRVDVAAPFFDAQCGLTFGSWTHGCHQLDVRPRGAAASLADFVENVEWRVGLGMPARRRVLTYGCCSEPYPDVTFTLLLRRAAAY
a10Dog    : STNVVLRHDCAVRWDAPAITRSSCRVDVAAPFFDAQCGLTFGSWTHGCHQLDVRPRGAAASLADFVENVEWRVGLGMPARRRVLTYGCCSEPYPDVTFTLLLRRAAAY
a10Elephan : STNVVLRHDCAVRWDAPAITRSSCRVDVAAPFFDAQCGLTFGSWTHGCHQLDVRPRGAAASLADFVENVEWRVGLGMPARRRVLTYGCCSEPYPDVTFTLLLRRAAAY
a10Armadil : STNVVLRHDCAVRWDAPAITRSSCRVDVAAPFFDAQCGLTFGSWTHGCHQLDVRPRGAAASLADFVENVEWRVGLGMPARRRVLTYGCCSEPYPDVTFTLLLRRAAAY
a10Kangaro : STNVVLRHDCAVRWDAPAITRSSCRVDVAAPFFDAQCGLTFGSWTHGCHQLDVRPRGAAASLADFVENVEWRVGLGMPARRRVLTYGCCSEPYPDVTFTLLLRRAAAY
a10Opossum : STNVVLRHDCAVRWDAPAITRSSCRVDVAAPFFDAQCGLTFGSWTHGCHQLDVRPRGAAASLADFVENVEWRVGLGMPARRRVLTYGCCSEPYPDVTFTLLLRRAAAY
a10Platypu : STNVVLRHDCAVRWDAPAITRSSCRVDVAAPFFDAQCGLTFGSWTHGCHQLDVRPRGAAASLADFVENVEWRVGLGMPARRRVLTYGCCSEPYPDVTFTLLLRRAAAY
a10Lizard  : ETNVVLRHDCAVRWDAPAITRSSCRVDVAAPFFDAQCGLTFGSWTHGCHQLDVRPRGAAASLADFVENVEWRVGLGMPARRRVLTYGCCSEPYPDVTFTLLLRRAAAY
a10Chick   : ETNVVLRHDCAVRWDAPAITRSSCRVDVAAPFFDAQCGLTFGSWTHGCHQLDVRPRGAAASLADFVENVEWRVGLGMPARRRVLTYGCCSEPYPDVTFTLLLRRAAAY
a10Frog    : ETNVVLRHDCAVRWDAPAITRSSCRVDVAAPFFDAQCGLTFGSWTHGCHQLDVRPRGAAASLADFVENVEWRVGLGMPARRRVLTYGCCSEPYPDVTFTLLLRRAAAY
a10Zebrafi : ETNVVLRHDCAVRWDAPAITRSSCRVDVAAPFFDAQCGLTFGSWTHGCHQLDVRPRGAAASLADFVENVEWRVGLGMPARRRVLTYGCCSEPYPDVTFTLLLRRAAAY
a10Medaka  : ETNVVLRHDCAVRWDAPAITRSSCRVDVAAPFFDAQCGLTFGSWTHGCHQLDVRPRGAAASLADFVENVEWRVGLGMPARRRVLTYGCCSEPYPDVTFTLLLRRAAAY
a10Fugu    : ETNVVLRHDCAVRWDAPAITRSSCRVDVAAPFFDAQCGLTFGSWTHGCHQLDVRPRGAAASLADFVENVEWRVGLGMPARRRVLTYGCCSEPYPDVTFTLLLRRAAAY

```

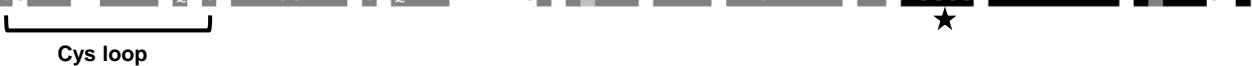

Cys loop

```

20          *          240          *          260          *          280          *          300          *          320
a10Human   : VCNLLPCVLISSLAPLAFHLPADSGEKVSLGVTVLLALTVPFQLLLAESMPPAESVPLIGKYMATMTMVTFSALTILIMNLHYCGPSVRPVPAPAWARALLLGHLAGL
a10Chimp   : VCNLLPCVLISSLAPLAFHLPADSGEKVSLGVTVLLALTVPFQLLLAESMPPAESVPLIGKYMATMTMVTFSALTILIMNLHYCGPSARVPVPAPAWARALLLGHLAGL
a10Marmose : VCNLLPCVLISSLAPLAFHLPADSGEKVSLGVTVLLALTVPFQLLLAESMPPAESVPLIGKYMATMTMVTFSALTILIMNLHYCGPSARVPVPAPAWARALLLGHLAGL
a10Rat     : VCNLLPCVFISSLAPLAFHLPADSGEKVSLGVTVLLALTVPFQLILAESMPPAESVPLIGKYMATMTMVTFSALTILIMNLHYCGPNAHPVPAPAWARVLLLGHLAGL
a10Mouse   : VCNLLPCVFISSLAPLAFHLPADSGEKVSLGVTVLLALTVPFQLILAESMPPAESVPLIGKYMATMTMVTFSALTILIMNLHYCGPNAHPVPAPAWARVLLLGHLAGL
a10Cow     : VCNLLPCVLISSLAPLAFHLPADSGEKVSLGVTVLLALTVPFQLILAESMPPAESVPLIGKYMATMTMVTFSALTILIMNLHYCGPSARVPVPAPAWARALLLGHLAGL
a10Dolphin : VCNLLPCVLISSLAPLAFHLPADSGEKVSLGVTVLLALTVPFQLLLAESMPPAESVPLIGKYMATMTMVTFSALTILIMNLHYCGPSARVPVPAPAWARTLLLGHLAGL
a10Microba : VCNLLPCVLISSLAPLAFHLPADSGEKVSLGVTVLLALTVPFQLILAESMPPAESVPLIGKYMATMTMVTFSALTILIMNLHYCGPSARVPVPAPAWARAFLLGLLAGL
a10Megabat : VCNLLPCVLISSLAPLAFHLPADSGEKVSLGVTVLLALTVPFQLLLAESMPPAESVPLIGKYMATMTMVTFSALTILIMNLHYCGPTARVPVPAPAWARAFLLGHLAGL
a10Dog     : VCNLLPCVLISSLAPLAFHLPADSGEKVSLGVTVLLALTVPFQLLLAESMPPAESVPLIGKYMATMTMVTFSALTILIMNLHYCGPSARVPVPAPAWARTLLLGHLAGL
a10Elephan : VCNLLPCVLISSLAPLAFHLPADSGEKVSLGVTVLLALTVPFQLLLAESMPPAESVPLIGKYMATMTMVTFSALTILIMNLHYCGSSAHPVPAPAWARTLLLGHLAGL
a10Armadil : VCNLLPCVLISSLAPLAFHLPADSGEKVSLGVTVLLALTVPFQLLLAESMPPAESVPLIGKYMATMTMVTFSALTILIMNLHYCGPSARVPVPAPAWARALLLGHLAGL
a10Kangaro : VANLLPCVLISSLAPLAFHLPADSGEKVSLGVTVLLALTVPFQLLLAENMPPAESVPLIGKYMTTALVTASTALTILIMNLHYSGPVGPVPAPAWAQTLLLGHLAGL
a10Opossum : VANLLPCVLISSLAPLAFHLPADSGEKVSLGVTVLLALTVPFQLLLAENMPPAESVPLIGKYMTTALVTASTALTILIMNLHYSGPVGPVPAPAWAQTLLLGHLAGL
a10Platypu : VCNLLPCVLISSLAPLAFLLPAASGEKVS LGVTVLLALTVPFQLLVAETMPPAESVPLIGKYIIVTMTMVTASTALTIFIMNLHYCGPGARVPVPAPAWARALILDRLARLL
a10Lizard  : IFNLLPCVMISFLAPLGFYLPADSGEKVSLGVTVLLALTVPFQLLVAESMPPESENVPLIGKYIATMTMITASTALTIFIMNIHHC GPGAKVPVQWAKVLI LHYMARIF
a10Chick   : IFNLLPCVMISFLAPLGFYLPADSGEKVSLGVTVLLALTVPFQLLVAESMPPESENVPLIGKYIATMTMITASTALTIFIMNIHHC GPGARVPVPPWARRLILHHLARAL
a10Frog    : IFNLLPCVMISFLAPLGFYLPADSGEKVSLGVTVLLALTVPFQLLVAESMPPESENVPLIGKYIATMTMITASTALTIFIMNIHHC GPEAKVPVQWAKKFI LQYMSRIF
a10Zebrafi : IFNLLPCMMISFLAPLGFYLPADSGEKVSLGVTVLLALTVPFQLLVAESMPPESENVPLIGKYIATMTMITASTALTIFIMNIHHC GPEAQPVSWARRFILNYLARFC
a10Medaka  : IFNLLPCMMISFLAPLGFYLPADSGEKVSLGVTVLLALTVPFQLLVAESMPPESENVPLIGKYIATMTMVTASTALTIFIMNIHHC GSEARVPVQWQRFVNLHARIC
a10Fugu    : IFNLLPCMMISFLAPLGFYLPADSGEKVSLGVTVLLALTVPFQLLVAESMPPESENVPLIGKYIATMTMVTASTALTIFIMNIHHC GSEAHVPVSWAERFILNYLARIC

```

```

          *          340          *          360          *          380          *          400          *          420          *
a10Human   : CVRE-RGEPGQSRPP-----ELSPSP---QSPGGAGPPAG-----
a10Chimp   : CVRE-RGEPGQSRPP-----ELSPSP---QSPGGAGPPAG-----
a10Marmose : CVRE-RGQPCGQSRPP-----ESSPIP---EPPEGGAGHPEG-----
a10Rat     : CVRE-RGEPGQSKPL-----ESAPSL---QPP---PASPAG-----
a10Mouse   : CVRE-RGEPGQSKPL-----ESAPSL---QPP---ACPPAG-----
a10Cow     : CVRE-RGEPGQSRPP-----ESSPSP---QPPDRGTGPPAG-----
a10Dolphin : CVRE-RGEPGQSRPP-----ESSPSP---QPPDREAGPPAG-----
a10Microba : CVRE-RGEPGKSRRH-----ESPPSP---QPPEGGAGPPAG-----
a10Megabat : CVRE-RGEPGGRSRPP-----KSPSPSP---QPPKGGACLPAG-----
a10Dog     : CVRE-RGEPGQARPP-----ESSPSP---RPPDGGARPPAV-----
a10Elephan : CVRE-RGEPGQFRPP-----ESPPSP---QPPEEGACPLAG-----
a10Armadil : CVRE-RGEPGQSRPP-----ESLLSP---QPPEGRADPPSG-----
a10Kangaro : CVRE-RGEACGGSQHP-----PVPPLPSMHPKPRLGPGSGAG-----
a10Opossum : CVRE-RGEPGGAQHP-----LVPRRPSVHPKPRLGQGSASG-----
a10Platypu : CMREPEGDPSEPQSAR-----DPETVGGAGGQ-----
a10Lizard  : FVRE-VGESCRSPRPE-----PDP---SPKAPGSGGARG-----PASP-----
a10Chick   : CVRE-VGESCRPQRE-----GTGG--MGPRDPPGEGVEP-----
a10Frog    : FVRE-VGESCRPRTE-----PEPNSERTSKVPGIDGQAKREDIADV-----VKDCPEKLSPKDKEAKEELEHSKYA
a10Zebrafi : FVRE-MGQSCVSVHTD--QPAK-----KGNNTINGQARG----ED-FALRLHEGCSQVKDQFNEDASPTLSPQQRKEHQSGWRIG-----TFVEIE
a10Medaka  : FLRE-AGDSCLSRASSLKQPLSQESDAPSAGAGTTGTNWRNQGQVWRGKVEEDNTGVSLSSTEQDLTKQVIWKEDLFVTDHSAERGAAGGHKEG--EKSNSMSAGGVA
a10Fugu    : FVRE-VGENCMDGTSS-RQPSQMEAEVLSASGVNAKANWDVNGQALGRTDED---AASNTGQDVISDKDLKEDLFVTDHSEE-GAAKPCVEVGKEEATSTFTGGEKE

```

```

440          *          460          *          480          *          500          *          520
a10Human   : -----PCHEPRCLCRQ-EALLHHVATIANTFRSHRAAQRCHEDWKRLARVMDRFFLAIFFSMALVMSLLVLVQAL
a10Chimp   : -----PCHEPRCLCRQ-EALLHHVATIANTFRSHRAAQRCHEDWKRLARVMDRFFLGIFFSMALVMSLLVLVQAL
a10Marmose : -----PCHEPRCLCHQ-EALLRHVATIANTFRSHRAAQRCHEDWKRLARVMDRFFLGIFFSMALVMSLLVLVQAL
a10Rat     : -----PCHEPRCLCHQ-EALLHHIASIASTFRSHRAAQRHEDWKRLARVMDRFFLGIFFCMALVMSLIVLVQAL
a10Mouse   : -----PCHEPRCLCHQ-EALLHHVASIAGTFRSHRAAQRHEDWKRLARVMDRFFLGIFFCMALVMSLLVLVQAL
a10Cow     : -----PCREPRCLCRQ-EALLRHVATIANAETHSHRAAQRHEDWKRLARVMDRFFLGIFFSMALVMSLLVLVQAL
a10Dolphin : -----PCHEPRCLCHQ-EALLRHVATIINTFRSHRAAQRCHBEWKRLARVMDRFFLGIFFSMALVMSLLVLVQAL
a10Microba : -----PCHEPRCLCHQ-EALLHHVATIANTFRSHRAAQRHEDWKRLARVMDRFFLGIFFSMALVMSLLVLVQAL
a10Megabat : -----PCHEPRCLCHQ-EALLRHVATIANTFRSHRAAQRHEDWKRLARVMDRFFLGIFFSMALVMSLLVLVQAL
a10Dog     : -----PCREPRCLCRQ-EALLHHVATIANAETHSHRAAQRHEDWKRLARVMDRFFLGIFFSMALVMSLLVLVQAL
a10Elephan : -----PCHELCCLCHQ-EALLHHVATIANTFRSYRAAQRHEDWKRLARVMDRFFLGIFFSMALVMSLLVLVQAL
a10Armadil : -----PCHEPRCLCHQ-EALLHHVATIANTFRSHRAAQRHEDWKRLARVMDRFFLCIFFSMALVMSL??????
a10Kangaro : -----PCPEPRCPCHQ-EALLRHVGATAVACRSHRAAQLRGDWKRLARVDRFFLAVFFAMVLAMSLLVLGHAI
a10Opossum : -----PCSEPRCPCHQ-EALLRHVGATAVACRSHRAAQLRGDWKRLARVDRFFLAVFFVMVLAMSLLVLGHAI
a10Platypu : -----PCGQPHCPCHQ-VDVRRHVADIARCFRSHQVAQRSGEWRRVARVDRFFMWVFSAMVLAMSLLVLGRGL
a10Lizard  : ----GEAFVDLEGVPG---GSASCAKGGCLCRQSSILRNVEYIANCEFRDQKAASKRTGEWKKVAKVMDRFFMWVFFAMVFI
a10Chick   : -----LCPRSRCLCHH-HAVLSSVGYIAGVFRRHRTAQRRAAEWKKVAKVMDRFFMWVFFIMVFLMSVLVIGKAA
a10Frog    : HSQESGKYYVSEQGGVKGFGYEECPKIHCCLCHN-EALLRNVEYIANCEFRDQKATQKRTGEWKKVAKVMDRFFMWVFFIMVFL
a10Zebrafi : HGESAGATGETGASRKESVKKREILVLSQCLCHQ-CALLRNVEYIANFYQEQKATQRNAEWRKVKVMDRFFMWIFFIMVFLMSL
a10Medaka  : AGEHAEEKSDVEGG-AQQR-REILVRTQCVCQH-CALLRSNVEFIASSYQDQRVAQLRITTEWRKVKVMDRFFMWLFFILFFFM
a10Fugu    : QAEEKKGGPQQRGGRTGSK-REIFVKAQCVCQH-CGLCRNIEYITSSYQDQRAAQLRIGEWKVKVMDRFFMWLFFIMVFI

```
